# Supplementary material for: Deep Learning-Based Automatic Diagnosis of Keratoconus with Corneal Endothelium Image
Source: Springer Nature journal article supplement (doi:10.1007/s40123-023-00795-w), 2023-09-04
Supplement: MOESM1 [file 26002804]

## **SUPPLEMENTARY MATERIALS**

### **Deep Learning-Based Automatic Diagnosis of Keratoconus**

#### **with Corneal Endothelium Image**

**Authors:**

Qi Wan\*, Ran Wei\*, Ke Ma, Hongbo Yin, Ying-ping Deng, Jing Tang

**Affiliation:**

Department of Ophthalmology, West China Hospital, Sichuan University, Chengdu City, Sichuan Province, China

**Corresponding Authors:**

Jing Tang: tangjing0802@163.com

Ying-ping Deng: dyp\_wch@163.com

\* These authors contributed equally as co-first authors.

Table S1: The deep-learning features of patients

| ID             | IN-0     | IN-1     | RS-0     | RS-1     | DS-0     | DS-1     | MB-0     | MB-1     |
|----------------|----------|----------|----------|----------|----------|----------|----------|----------|
| JamesOD.jpg    | -0.54776 | 0.371091 | -1.6356  | -0.64266 | -34.1901 | 1.076195 | -0.2461  | -0.37941 |
| JamesOS.jpg    | 0.182956 | 0.034874 | 0.114649 | -0.20752 | 22.42792 | -36.2942 | 0.099497 | -0.73138 |
| keylaOD.jpg    | 1.293273 | -0.08549 | 2.257025 | -0.41306 | 95.22656 | -60.1174 | 1.173493 | -0.43172 |
| keylaOS.jpg    | 1.059685 | -0.01453 | 0.72522  | -1.14897 | -10.475  | -8.35384 | 0.956453 | -0.63344 |
| 付昊 OD.jpg      | 0.227178 | 0.001178 | 0.616629 | -0.67621 | 25.05324 | -38.6473 | -0.32376 | -0.43229 |
| 付昊 OS.jpg      | -0.60549 | -0.07647 | -1.56346 | -0.17753 | -31.8198 | -0.76756 | -1.03677 | 0.247942 |
| 付芷晴 OD.jpg     | 1.526234 | -0.08467 | 3.124604 | 0.115838 | 81.63192 | 13.50419 | 1.682729 | -0.0691  |
| 付芷晴 OS.jpg     | -0.91006 | -0.19386 | -1.39707 | 0.440643 | -32.3605 | 0.887297 | -1.22025 | 0.527134 |
| 任一安 OD.jpg     | -0.51879 | -0.24851 | -1.21299 | -0.04268 | -29.9509 | -1.4877  | -0.88032 | 0.077199 |
| 任一安 OS.jpg     | -0.64252 | -0.11662 | -0.78197 | 0.301412 | -24.3828 | -2.93724 | -0.83804 | 0.129992 |
| 任健 OD.jpg      | -1.0949  | -0.22155 | -2.49455 | 0.835582 | -34.0652 | 2.047912 | -0.82177 | 0.410313 |
| 任健 OS.jpg      | -0.3906  | -0.00069 | -1.56964 | -0.57861 | -30.6931 | 0.173618 | -0.72091 | -0.16811 |
| 任柏旭 OD.jpg     | 1.001394 | -0.02452 | 0.719091 | -0.93006 | -2.87295 | -15.1017 | 1.820536 | -0.18166 |
| 任柏旭 OS.jpg     | 1.079646 | -0.15107 | 1.091888 | -0.55413 | 0.808934 | 17.70716 | 1.752269 | -0.04855 |
| 伍小琳 OD.jpg     | 0.764653 | 0.083039 | 2.108819 | -0.39194 | 65.97347 | -16.3286 | 0.962837 | -0.46503 |
| 伍小琳 OS.jpg     | -1.04334 | -0.23816 | -2.61926 | 0.784279 | -34.3507 | 2.112164 | -0.50828 | 0.324626 |
| 何杨云帆<br>OD.jpg | -0.79899 | -0.10256 | -1.75806 | 0.58685  | -33.0188 | 1.887735 | -0.86902 | 0.146073 |
| 何杨云帆<br>OS.jpg | 0.69582  | 0.006965 | 1.230438 | -0.68413 | 51.8179  | -45.6703 | 0.563879 | -0.64772 |
| 何毅 OD.jpg      | 0.217424 | 0.321666 | 0.757799 | 0.050777 | -17.4083 | 5.360276 | -1.20506 | 0.324208 |

|                |          |          |          |          |          |          |          |          |
|----------------|----------|----------|----------|----------|----------|----------|----------|----------|
| 何毅 OS.jpg      | -0.46307 | 0.473382 | -2.09375 | -0.26467 | -34.9825 | 1.869368 | -1.09714 | 0.965686 |
| 何磊 OD.jpg      | -0.30974 | 0.006921 | -0.04655 | -0.13606 | -16.1353 | -7.77123 | -1.00186 | -0.10888 |
| 何磊 OS.jpg      | -0.59496 | -0.19019 | -0.26269 | 0.728194 | -2.08825 | -14.8735 | -1.20502 | 0.474195 |
| 余方洋 OD.jpg     | 0.754372 | 0.182081 | 1.539232 | -0.20506 | -6.1552  | 36.26613 | 1.915549 | 0.590446 |
| 余方洋 OS.jpg     | -0.14635 | -0.05184 | 0.232543 | 0.404828 | -15.6913 | 14.54722 | 0.076939 | -0.39266 |
| 余沛泽 OD.jpg     | 1.536707 | -0.17958 | 1.63604  | -0.94963 | 64.34354 | -50.1058 | 1.654389 | -0.25995 |
| 余沛泽 OS.jpg     | 1.099081 | -0.09642 | 1.51102  | -0.7439  | 17.81517 | -4.97243 | 1.390059 | -0.32543 |
| 余波 OS.jpg      | 0.516433 | 0.196479 | -0.71923 | -1.27377 | -28.0089 | 4.756914 | 0.386192 | -0.14217 |
| 全虹翰 OD.jpg     | -0.84446 | -0.08449 | -1.26541 | 1.227685 | -31.3577 | 4.143542 | -1.16897 | 0.526    |
| 全虹翰 OS.jpg     | 0.509785 | 0.219743 | 4.047023 | 0.784245 | 21.80142 | 17.14703 | 2.005771 | 0.580686 |
| 兰湖飘坤<br>OD.jpg | 0.009658 | 0.154359 | 1.315131 | 0.089273 | 13.46844 | -4.95736 | -0.39608 | -0.41214 |
| 兰湖飘坤<br>OS.jpg | 1.91459  | -0.403   | 2.297102 | -0.81313 | 39.08436 | 47.89894 | 2.825051 | 0.896202 |
| 冯泰锡 OD.jpg     | -0.45377 | -0.13238 | -0.24908 | 0.340198 | -17.5639 | 7.336571 | -0.46042 | -0.27783 |
| 冯泰锡 OS.jpg     | -0.1203  | 0.191109 | -1.207   | -0.37752 | -31.2504 | 1.43743  | -0.18772 | -0.58303 |
| 刘俊骥 OD.jpg     | -0.50206 | 0.021803 | -0.14206 | 0.208132 | -11.483  | -4.02055 | -0.82088 | -0.06628 |
| 刘俊骥 OS.jpg     | 2.338964 | -0.55535 | 5.45709  | 0.581819 | 197.2151 | 56.53885 | 3.848499 | 1.774634 |
| 刘强 OD.jpg      | -0.47274 | 0.048724 | 1.086891 | 0.661956 | -6.24822 | 6.171862 | -0.30254 | -0.43322 |
| 刘强 OS.jpg      | -0.08143 | 0.602004 | -1.17589 | -0.7083  | -34.3254 | 0.496614 | 0.111685 | -0.02922 |
| 刘沙 OS.jpg      | 1.697263 | -0.23198 | 2.847619 | -0.41276 | 95.95735 | -56.0067 | 3.525541 | 1.214256 |
| 刘瑞 OD.jpg      | -0.37194 | -0.14595 | -1.00047 | 0.788903 | -21.294  | 13.41309 | -0.61637 | 0.04237  |
| 刘瑞 OS.jpg      | -0.91264 | -0.10268 | -1.58428 | -0.17155 | -32.277  | 2.668048 | -0.6895  | -0.03875 |
| 刘臻豪 OS.jpg     | -0.55977 | -0.06221 | -1.08638 | -0.27573 | -29.2012 | -3.42966 | -0.89406 | 0.170893 |
| 刘鑫艺 OD.jpg     | -0.85661 | -0.11043 | -1.95159 | 0.896292 | -32.7857 | 2.535398 | -1.20143 | 0.118093 |

|            |          |          |          |          |          |          |          |          |
|------------|----------|----------|----------|----------|----------|----------|----------|----------|
| 刘鑫艺 OS.jpg | 0.935942 | 0.094586 | -0.60903 | -1.8668  | -18.4387 | 13.98896 | 0.621722 | -0.51734 |
| 刘铮 OD.jpg  | 1.794133 | -0.26153 | 1.679716 | -0.64534 | 77.78011 | -50.9138 | 2.308491 | 0.063903 |
| 刘铮 OS.jpg  | -0.04183 | -0.04436 | -1.18311 | -0.94061 | -29.9342 | 0.807897 | -0.8628  | -0.29774 |
| 刘雨亭 OD.jpg | -1.17016 | -0.22344 | -2.57304 | 0.902962 | -34.8075 | 1.945512 | -1.0099  | 0.716887 |
| 刘雨亭 OS.jpg | -0.46427 | -0.0473  | -1.52864 | -0.36296 | -30.9991 | -0.64764 | -1.20222 | 0.235882 |
| 包维凯 OD.jpg | 0.150564 | 0.122118 | 0.390465 | -0.27686 | 28.98702 | -31.9677 | -0.12248 | -0.44549 |
| 卢志鹏 OD.jpg | 0.375639 | 0.191107 | 0.615828 | -0.5583  | -15.5986 | 2.762641 | 0.900954 | -0.26667 |
| 卢志鹏 OS.jpg | -0.85049 | -0.1627  | -2.03822 | 0.024365 | -31.5215 | -1.31574 | -1.22475 | 0.79232  |
| 卢思琪 OD.jpg | -0.25068 | -0.02095 | -0.51499 | -0.03563 | -6.89248 | -13.2491 | -0.73058 | -0.07991 |
| 卢思琪 OS.jpg | -0.15318 | 0.106728 | -0.80092 | -0.72539 | -28.3086 | 0.442962 | -0.89825 | -0.27918 |
| 卢浩 OD.jpg  | -1.05182 | -0.20758 | -2.36629 | 0.491051 | -33.5772 | 1.663781 | -0.9098  | 0.466416 |
| 卢浩 OS.jpg  | -0.96046 | 0.012188 | -2.36919 | 0.971367 | -34.9914 | 1.263839 | -0.95111 | 0.667153 |
| 卫琳佳 OD.jpg | -0.80438 | -0.04231 | -2.16431 | 0.548301 | -33.8618 | 2.346879 | -1.17777 | 0.670256 |
| 卫琳佳 OS.jpg | -1.00837 | -0.15851 | -2.05712 | -0.2944  | -33.67   | 1.787936 | -0.75347 | 0.27955  |
| 叶江 OD.jpg  | -0.32839 | -0.21926 | -0.10963 | -0.20934 | 3.651639 | -28.3837 | -1.00571 | -0.03337 |
| 叶江 OS.jpg  | 0.931583 | 0.053768 | 1.103545 | -0.90454 | -5.38238 | -11.0405 | 1.508486 | 0.083584 |
| 叶龙 OS.jpg  | 0.598277 | 0.128365 | -0.38038 | -1.15717 | -28.1546 | 1.961323 | 0.454386 | -0.57137 |
| 向茂松 OD.jpg | -0.44592 | -0.08044 | -0.52754 | 0.313992 | -21.618  | -2.78308 | -1.18692 | 0.033711 |
| 向茂松 OS.jpg | 0.083792 | 0.164654 | 0.187377 | -0.09557 | -17.2796 | 8.950971 | -0.55629 | -0.40057 |
| 吴川北 OD.jpg | -0.8009  | 0.122681 | -0.48554 | 0.571888 | -14.7653 | -3.50775 | -0.91273 | 0.170918 |
| 吴洋 OD.jpg  | -0.02322 | 0.23784  | -0.82826 | -0.17381 | -29.6177 | 6.976728 | -0.11671 | -0.45183 |
| 吴洋 OS.jpg  | -0.23081 | 0.158646 | 0.296694 | 1.085726 | -4.51006 | 43.51071 | -0.60139 | -0.10312 |
| 吴红梅 OD.jpg | 0.456105 | 0.162626 | 1.760126 | -0.47743 | 73.29152 | -60.4618 | 1.212859 | -0.3289  |
| 吴长骏 OD.jpg | 0.067281 | -0.0467  | 0.845086 | -0.21813 | 59.44678 | -49.8589 | -0.19377 | -0.42281 |
| 吴长骏 OS.jpg | 1.163848 | -0.05009 | 1.506547 | -0.4843  | 25.14431 | -14.9155 | 0.263942 | -0.48206 |

|            |          |          |          |          |          |          |          |          |
|------------|----------|----------|----------|----------|----------|----------|----------|----------|
| 周吉 OD.jpg  | 0.511432 | 0.286816 | 1.361615 | 0.161253 | 13.90406 | 27.36722 | -0.32942 | -0.51474 |
| 周吉 OS.jpg  | -0.7776  | 0.332801 | -2.27185 | 0.034061 | -35.4257 | 1.151202 | -0.90091 | 0.768362 |
| 周垣 OD.jpg  | 0.944551 | 0.029972 | 1.94991  | -0.40269 | 53.78186 | -25.1523 | 1.440206 | -0.30878 |
| 周垣 OS.jpg  | -0.59602 | -0.172   | -1.39553 | -0.12835 | -30.8413 | -2.06242 | -0.87135 | 0.182119 |
| 周天林 OD.jpg | 0.022367 | 0.146249 | 0.857223 | -0.27212 | 23.44722 | -5.67313 | 0.15973  | -0.45956 |
| 周文杰 OD.jpg | 1.004136 | -0.03394 | 1.909356 | -0.40659 | 44.86604 | 3.048753 | 1.49378  | -0.25264 |
| 周文杰 OS.jpg | -1.02133 | -0.15261 | -2.55705 | 0.720241 | -34.1653 | 1.708954 | -0.81322 | 0.258661 |
| 周杰 OD.jpg  | 0.719911 | -0.02823 | 0.618406 | -0.02127 | 5.89628  | 18.38958 | 2.266422 | 0.177717 |
| 周杰 OS.jpg  | 0.42732  | 0.039125 | 1.929948 | 0.540813 | 18.15063 | 72.89228 | 2.340441 | 0.111189 |
| 周睿熙 OD.jpg | 1.112512 | 0.095209 | 2.231328 | -0.16594 | 69.6981  | -32.5066 | 1.813682 | -0.24857 |
| 周雅萍 OD.jpg | 0.75362  | 0.079511 | 1.323439 | -0.45702 | 67.12775 | -44.5413 | 1.790382 | -0.25969 |
| 周雅萍 OS.jpg | -0.22512 | 0.335166 | 1.091298 | 0.967557 | 6.393369 | 3.529654 | -0.13842 | 0.078546 |
| 唐小林 OD.jpg | -0.96022 | 0.091237 | -2.33627 | 0.23362  | -34.6292 | 0.948548 | -1.16597 | 1.054621 |
| 唐小林 OS.jpg | -0.89625 | -0.07325 | -2.16402 | 0.570901 | -32.7005 | -1.57671 | -1.22871 | 1.040147 |
| 唐强 OD.jpg  | -0.82013 | -0.01377 | -1.67727 | -0.06698 | -33.4743 | 1.884496 | -0.16461 | -0.26964 |
| 唐强 OS.jpg  | 1.64805  | -0.24455 | 1.7739   | -0.96013 | 51.32201 | -15.509  | 1.888681 | 0.000438 |
| 喻禄刚 OD.jpg | 1.490397 | -0.05229 | 3.999616 | 0.720865 | 37.53048 | 83.70143 | 2.296788 | 0.206492 |
| 喻禄刚 OS.jpg | 2.01716  | -0.40227 | 1.006464 | -1.15808 | 27.41497 | -11.8821 | 2.382657 | 0.180489 |
| 夏万润 OD.jpg | -0.08283 | 0.084436 | -0.1734  | 0.335407 | 14.57106 | -24.3709 | -0.62808 | -0.09298 |
| 夏万润 OS.jpg | -0.97561 | -0.1828  | -2.21423 | 0.467277 | -33.1796 | 1.498024 | -0.95463 | 0.400869 |
| 姜吟 OD.jpg  | 0.930745 | 0.122308 | 1.287175 | -0.25983 | 20.1313  | 0.623583 | 0.257827 | -0.66717 |
| 姜吟 OS.jpg  | -0.94619 | -0.11523 | -2.09595 | 0.770256 | -33.9502 | 2.589676 | -0.64071 | 0.284095 |
| 姜鹏 OD.jpg  | 0.537464 | 0.092719 | 2.015287 | -0.05083 | 23.54143 | 3.074879 | 0.987828 | -0.51142 |
| 姜鹏 OS.jpg  | 1.187217 | -0.02495 | 1.713161 | -0.68533 | 37.70789 | -35.3848 | 1.189918 | -0.45738 |
| 孟冲冲 OD.jpg | -0.79504 | -0.11673 | -1.89563 | 0.421767 | -32.7416 | 1.530007 | -1.27817 | 0.463911 |

|            |          |          |          |          |          |          |          |          |
|------------|----------|----------|----------|----------|----------|----------|----------|----------|
| 孟冲冲 OS.jpg | -0.83863 | 0.075085 | -1.88311 | -0.57617 | -33.0479 | 1.377534 | -0.85675 | 0.045309 |
| 安熙 OD.jpg  | -0.32731 | 0.096426 | -0.81075 | 0.056306 | -30.7977 | 3.424841 | -0.27753 | -0.44332 |
| 安熙 OS.jpg  | 1.499229 | -0.17463 | 1.726348 | -1.00852 | 32.74222 | -33.7414 | 1.469608 | -0.05568 |
| 宋大庆 OD.jpg | -0.27058 | 0.068937 | -0.05991 | 0.479625 | -23.3499 | -0.96698 | -1.14775 | 0.228779 |
| 宋大庆 OS.jpg | -0.4169  | 0.019183 | -1.04811 | -0.76302 | -28.1564 | -1.09285 | -0.63995 | -0.30775 |
| 屈宇豪 OD.jpg | 0.462872 | -0.02253 | 0.831117 | -0.31883 | -14.911  | 7.071859 | 0.638306 | -0.4519  |
| 屈宇豪 OS.jpg | -0.32321 | 0.217325 | -1.31511 | -0.76283 | -29.4121 | 3.052532 | -0.17476 | -0.42309 |
| 巩皓宇 OD.jpg | 1.808469 | -0.24923 | 2.159255 | -0.46866 | 97.97091 | -52.3361 | 1.829136 | -0.18693 |
| 巩皓宇 OS.jpg | 1.102064 | 0.113658 | 4.118783 | 0.663302 | 59.80141 | 37.90634 | 2.497122 | 0.75653  |
| 康俊 OD.jpg  | 1.343038 | -0.03214 | 2.271679 | -0.53418 | 98.42117 | -32.8228 | 1.382701 | -0.33775 |
| 康南海 OD.jpg | 1.496008 | -0.21728 | 2.090591 | -0.03918 | 77.52911 | 83.17148 | 2.710239 | 0.377155 |
| 康南海 OS.jpg | -0.425   | -0.08553 | 0.1884   | 0.048958 | -7.92325 | 2.728107 | -0.89575 | -0.18528 |
| 张嘉炜 OD.jpg | -0.36026 | 0.052208 | 0.147404 | 0.473294 | -7.15485 | 12.90376 | -0.40229 | -0.38066 |
| 张嘉炜 OS.jpg | -1.18411 | -0.24813 | -2.25318 | 0.013451 | -34.5732 | 1.163025 | -0.9357  | 0.511835 |
| 张操 OD.jpg  | -0.93396 | 0.161412 | -2.03355 | -0.26282 | -34.5086 | 0.20672  | -1.1954  | 1.127796 |
| 张操 OS.jpg  | -0.66136 | -0.08712 | -1.41458 | -0.61114 | -31.226  | -0.65567 | -1.31558 | 0.508826 |
| 张文文 OD.jpg | 0.961111 | 0.06116  | 1.96411  | -0.28926 | 42.53228 | 11.88186 | 1.303098 | -0.39613 |
| 张文文 OS.jpg | 1.177719 | -0.06637 | 2.044146 | -0.37444 | 38.85832 | 28.22165 | 2.030713 | 0.064676 |
| 张栗鸣 OD.jpg | -0.48197 | -0.09558 | -0.96808 | 0.354191 | -19.3445 | -10.4267 | -1.18618 | 0.300433 |
| 张栗鸣 OS.jpg | 0.108507 | 0.180681 | -1.11772 | -1.31988 | -28.8449 | 0.462182 | 0.032471 | -0.39214 |
| 张楚洋 OD.jpg | -0.47884 | 0.162785 | -0.84755 | -0.02476 | -27.8691 | -1.75862 | -1.12307 | 0.236293 |
| 张楚洋 OS.jpg | 0.501067 | 0.119849 | 0.332823 | -0.65614 | 16.32219 | -40.1152 | -0.37428 | -0.41392 |
| 张涛 OD.jpg  | 0.024074 | 0.150842 | -1.28202 | -0.79528 | -32.058  | 2.029756 | 0.943465 | -0.432   |
| 张涛 OS.jpg  | 0.051964 | 0.129552 | -0.26861 | -0.27077 | 15.46993 | -30.9451 | -0.37925 | -0.24265 |
| 张涵韬 OD.jpg | -1.16282 | -0.29323 | -2.24966 | 1.960402 | -24.5747 | 16.06354 | -0.8717  | 0.278914 |

|                |          |          |          |          |          |          |          |          |
|----------------|----------|----------|----------|----------|----------|----------|----------|----------|
| 张涵韬 OS.jpg     | 0.457337 | 0.213159 | 2.348734 | 0.353704 | 20.1502  | 66.04472 | 1.924878 | -0.14521 |
| 张竣然 OD.jpg     | 0.285122 | 0.006339 | -1.28573 | -0.99488 | -30.5684 | 0.012769 | 0.111959 | -0.39303 |
| 张竣然 OS.jpg     | -0.31569 | 0.036527 | -0.97861 | -0.18293 | -29.027  | -0.32877 | -0.59586 | -0.27386 |
| 张莲君 OD.jpg     | -0.36362 | 0.025601 | 0.068105 | 0.288942 | -3.32204 | -8.19709 | -0.59011 | -0.2976  |
| 张莲君 OS.jpg     | 0.213044 | 0.215925 | 2.193107 | 0.666916 | 3.12889  | 22.54893 | -0.23341 | -0.36338 |
| 张锦河 OD.jpg     | -0.8889  | -0.28479 | -1.66249 | 0.047883 | -31.7903 | 0.752719 | -0.83828 | 0.218245 |
| 张锦河 OS.jpg     | 0.892266 | -0.05518 | 0.989257 | -0.85073 | 39.14072 | -40.0212 | 1.776383 | -0.1325  |
| 归诗夏 OD.jpg     | -0.74515 | 0.06834  | -2.03695 | -0.12    | -33.8168 | 1.83245  | -0.94476 | 0.020556 |
| 归诗夏 OS.jpg     | 0.465686 | 0.115229 | 0.665146 | -0.81602 | 12.57773 | -24.6707 | 0.885719 | -0.52474 |
| 彭思豪 OD.jpg     | -0.93905 | -0.16248 | -2.52966 | 0.620711 | -33.3588 | 1.108903 | -1.24318 | 0.526517 |
| 彭思豪 OS.jpg     | 0.084765 | -0.02851 | 1.109059 | -0.0664  | 29.76067 | -27.1156 | -0.41163 | -0.49222 |
| 彭措翁堆<br>OD.jpg | 1.784826 | -0.19319 | 2.782742 | -0.17853 | 51.43447 | 10.24452 | 3.29414  | 0.95261  |
| 彭措翁堆<br>OS.jpg | -0.16088 | 0.280831 | 2.690601 | 1.457885 | 49.81835 | 65.05551 | -0.51076 | -0.37667 |
| 彭秋阳 OS.jpg     | -0.61169 | 0.023524 | -2.01867 | 0.401541 | -30.8221 | -1.92859 | -0.88211 | 0.410987 |
| 彭芳 OD.jpg      | 0.466007 | 0.094222 | 2.229482 | 0.01115  | 36.50864 | 24.27081 | 1.84677  | 0.274061 |
| 彭芳 OS.jpg      | 0.299987 | 0.38356  | 3.131994 | 0.570098 | 69.13421 | -5.27711 | 2.437189 | 1.244862 |
| 徐博 OD.jpg      | -0.51925 | -0.04023 | -0.93854 | 0.002672 | -29.6796 | 1.390504 | -0.72324 | -0.22076 |
| 徐博 OS.jpg      | 1.042391 | 0.13488  | 0.747492 | -0.37174 | 66.29351 | -59.5386 | -0.01704 | -0.58138 |
| 徐毅 OD.jpg      | -0.7485  | -0.19151 | -1.87225 | 1.246241 | -29.029  | 6.238819 | -0.82117 | 0.122118 |
| 徐毅 OS.jpg      | -0.65954 | -0.19436 | -1.53741 | -0.03933 | -31.9191 | 0.645678 | -0.88276 | 0.164271 |
| 徐进 OD.jpg      | -0.9441  | -0.17324 | -1.86753 | 0.531274 | -32.9642 | 2.022709 | -0.84773 | 0.372997 |
| 徐进 OS.jpg      | -0.99426 | -0.06029 | -2.44222 | 0.946791 | -34.2624 | 2.470365 | -0.73899 | 0.405834 |

|                |          |          |          |          |          |          |          |          |
|----------------|----------|----------|----------|----------|----------|----------|----------|----------|
| 扎西达瓦<br>OD.jpg | 0.810206 | 0.019283 | 1.030464 | -0.76588 | 22.53801 | -27.9554 | 1.302264 | -0.37275 |
| 扎西达瓦<br>OS.jpg | -0.55448 | -0.04704 | -1.64684 | -0.78277 | -32.1373 | 1.772687 | -0.42296 | -0.28314 |
| 敏俊 OD.jpg      | -0.78847 | -0.00654 | -0.96181 | 0.476    | -30.2426 | 6.989393 | -0.85664 | -0.02534 |
| 敏俊 OS.jpg      | 1.393718 | -0.01516 | 3.026243 | 0.128292 | 27.37544 | 94.90823 | 3.108294 | 1.075478 |
| 晏永超 OD.jpg     | -0.82063 | -0.08453 | -0.76448 | 1.41845  | -23.7119 | 16.10089 | -0.85083 | 0.156269 |
| 曲别佳新<br>OD.jpg | 0.18083  | 0.25539  | 0.813165 | 0.438525 | -10.9422 | 16.19838 | -0.93735 | -0.02875 |
| 曲别佳新<br>OS.jpg | -0.92617 | -0.00055 | -1.82233 | -0.64078 | -33.3783 | 2.081673 | -0.65465 | 0.093924 |
| 曹寇 OD.jpg      | -0.73001 | -0.28881 | 0.697512 | 1.453954 | -3.47368 | 20.48501 | -1.01369 | 0.088955 |
| 曹寇 OS.jpg      | -1.11556 | -0.16339 | -2.42021 | 0.784392 | -34.9233 | 1.778011 | -1.14663 | 0.677323 |
| 曾俊涛 OD.jpg     | 0.985114 | 0.015063 | 1.052911 | -0.82824 | 2.441754 | -12.2029 | 0.116103 | -0.48544 |
| 曾俊涛 OS.jpg     | -0.55503 | -0.07016 | -0.8884  | -0.00641 | -31.2189 | 2.11536  | -0.4171  | -0.47147 |
| 朱强 OD.jpg      | 0.661588 | 0.164769 | 2.248022 | 0.220591 | 54.56781 | 19.23031 | 1.084963 | -0.42899 |
| 朱炳儒 OD.jpg     | -0.50609 | -0.13867 | -0.65887 | 0.129667 | -27.1358 | -1.64381 | -1.18959 | 0.341453 |
| 朱炳儒 OS.jpg     | -0.93961 | -0.06764 | -2.04236 | -0.22688 | -32.8209 | 2.204117 | -0.6108  | -0.2414  |
| 朱舸 OD.jpg      | -0.16431 | 0.013947 | 0.007743 | -0.7977  | -17.5713 | -8.97004 | -0.1     | -0.31687 |
| 朱舸 OS.jpg      | -0.88048 | 0.254444 | -2.1826  | -0.13036 | -35.2568 | 1.064942 | -1.17754 | 1.096135 |
| 李坦 OS.jpg      | 0.194488 | 0.046389 | 0.402766 | -0.42346 | -5.83387 | 5.079875 | 0.339201 | -0.61477 |
| 李大涛 OD.jpg     | -0.00251 | 0.04812  | 1.205536 | 0.693492 | 24.8805  | 55.14018 | -0.08808 | -0.4513  |
| 李大涛 OS.jpg     | -0.99386 | -0.08728 | -2.48189 | 0.958624 | -35.038  | 1.724406 | -0.80995 | 0.342134 |
| 李奕霆 OD.jpg     | 1.331324 | -0.13023 | 2.652647 | -0.42294 | 84.85834 | -17.2894 | 1.980278 | -0.1104  |
| 李奕霆 OS.jpg     | -0.83083 | -0.09607 | 0.32259  | 1.198805 | -32.3032 | 2.928421 | -0.34139 | -0.03207 |



|            |          |          |          |          |          |          |          |          |
|------------|----------|----------|----------|----------|----------|----------|----------|----------|
| 李居 OD.jpg  | -1.08576 | -0.16173 | -2.52734 | 0.861528 | -34.3914 | 2.36666  | -0.94161 | 0.680943 |
| 李居 OS.jpg  | -0.95287 | 0.091877 | -2.54313 | 0.668043 | -34.8779 | 1.750503 | -0.84238 | 0.776022 |
| 李彦君 OD.jpg | -0.82967 | -0.02248 | -2.10516 | 0.869845 | -34.0732 | 2.521411 | -1.12018 | 0.752709 |
| 李彦君 OS.jpg | -0.38187 | -0.06217 | -0.53131 | 0.379424 | -25.5817 | 7.746072 | -0.59367 | -0.13261 |
| 李彩虹 OD.jpg | -0.30977 | 0.129467 | 0.218259 | 0.105641 | 24.26653 | -37.9614 | -0.85119 | -0.15814 |
| 李彩虹 OS.jpg | -1.13515 | -0.24501 | -2.6029  | 0.669283 | -33.7672 | 0.365982 | -0.99447 | 0.478766 |
| 李志洙 OD.jpg | -0.56735 | 0.270375 | -0.97187 | 0.601023 | -32.9495 | 3.85696  | -0.68424 | -0.06965 |
| 李志洙 OS.jpg | -0.61409 | -0.04257 | -1.23806 | 0.049855 | -31.7969 | 3.890928 | -0.78199 | 0.01301  |
| 李政 OD.jpg  | -0.8232  | -0.03346 | -1.44362 | 0.570982 | -34.0105 | 2.780219 | -0.73426 | -0.13232 |
| 李殷杰 OD.jpg | -0.64963 | -0.16239 | -0.83864 | 0.102966 | -23.6344 | -2.31482 | -0.85921 | -0.01408 |
| 李殷杰 OS.jpg | -0.94636 | -0.16016 | -2.26864 | 0.261773 | -33.0111 | 1.431998 | -0.9804  | 0.39775  |
| 李浩杰 OD.jpg | 0.751835 | 0.11012  | 2.090133 | -0.15634 | 83.2602  | -6.11444 | 0.795856 | -0.40333 |
| 李浩杰 OS.jpg | 1.495084 | -0.15882 | 2.446386 | -0.47851 | 103.3215 | -24.2775 | 2.591266 | 0.419927 |
| 李玲玉 OD.jpg | -0.45386 | -0.15443 | -0.98137 | 0.609587 | -24.3579 | 3.17462  | -1.09072 | 0.159719 |
| 李玲玉 OS.jpg | 0.166475 | 0.051829 | 0.333595 | -0.15969 | -8.20212 | 8.191102 | 0.372048 | -0.53284 |
| 李英豪 OD.jpg | 0.896978 | 0.22683  | 1.492525 | -0.40637 | 25.98743 | -27.1148 | 1.577151 | -0.28381 |
| 李英豪 OS.jpg | -0.08766 | 0.157202 | 0.06758  | 0.711503 | -5.77529 | 21.3986  | -0.67872 | -0.16072 |
| 李鑫 OD.jpg  | 0.527123 | 0.051317 | 0.857184 | -0.11679 | 14.39176 | -21.0666 | -0.26781 | -0.36799 |
| 李鑫 OS.jpg  | -0.93647 | -0.18571 | -1.92257 | 1.101547 | -33.4381 | 2.194066 | -1.14518 | 0.543305 |
| 李锦琦 OD.jpg | 0.988934 | -0.10709 | 1.282187 | -0.71879 | 38.0201  | -41.5157 | 0.804501 | -0.58263 |
| 李锦琦 OS.jpg | -0.67844 | -0.00994 | -1.9708  | -0.15586 | -32.1294 | 1.127737 | -1.18418 | 0.38165  |
| 杜文滔 OS.jpg | -0.35382 | 0.381511 | -1.89809 | -0.53874 | -33.244  | -0.11937 | -0.9493  | 0.811298 |
| 杜鹃 OD.jpg  | -0.27132 | 0.107439 | -0.15659 | -0.6535  | -20.5401 | -4.20129 | -0.31078 | -0.47134 |
| 杜鹃 OS.jpg  | 0.442743 | -0.02785 | -0.38    | -1.17718 | -25.2118 | -0.0462  | -0.3698  | -0.43079 |
| 杨一帆 OD.jpg | -0.24504 | 0.128079 | 0.604869 | 0.385632 | -10.0472 | 27.31575 | -0.25492 | -0.29804 |

|                |          |          |          |          |          |          |          |          |
|----------------|----------|----------|----------|----------|----------|----------|----------|----------|
| 杨一帆 OS.jpg     | 0.520326 | 0.241039 | 2.729951 | 0.578672 | -2.47231 | 39.63362 | 0.360519 | -0.3685  |
| 杨建飞 OD.jpg     | 0.883782 | -0.02392 | 1.787418 | -0.13596 | 19.51198 | 19.45252 | 1.479347 | -0.13569 |
| 杨建飞 OS.jpg     | -1.13278 | -0.2505  | -2.55126 | 0.601359 | -34.0531 | 1.847387 | -0.79102 | 0.408524 |
| 杨慧清 OD.jpg     | -0.27032 | 0.244714 | -1.09266 | -0.06323 | -29.9809 | -1.33833 | -1.14444 | 0.740727 |
| 杨慧清 OS.jpg     | 1.667125 | -0.19615 | 0.757968 | -0.94875 | -27.0928 | 4.213434 | 2.324065 | 0.787167 |
| 杨晓林 OD.jpg     | -0.6437  | -0.07162 | -0.71009 | 0.611112 | -12.4154 | -9.38373 | -0.84803 | -0.06458 |
| 杨晓林 OS.jpg     | -0.77232 | -0.11868 | 0.086207 | 1.100337 | -13.4114 | -6.73686 | -0.74526 | -0.14773 |
| 杨洋 OD.jpg      | -0.90188 | -0.03896 | -2.43622 | 0.478296 | -34.3869 | 1.645297 | -1.12247 | 0.730295 |
| 杨洋 OS.jpg      | -1.12398 | -0.22693 | -2.50587 | 0.535445 | -33.9663 | 1.730882 | -0.99391 | 0.611243 |
| 杨洪 OS.jpg      | -0.12895 | 0.069354 | -1.45619 | -0.45041 | -31.2536 | 1.249352 | -0.25728 | -0.47718 |
| 杨琴 OD.jpg      | 0.815092 | -0.08685 | 2.204626 | -0.03358 | 52.72212 | -4.74473 | 1.145389 | -0.38552 |
| 杨琴 OS.jpg      | -0.95681 | -0.17241 | -2.05408 | -0.01205 | -32.9533 | 2.498686 | -0.67626 | 0.195176 |
| 杨艳 OD.jpg      | -0.14704 | 0.270965 | -1.4875  | -0.79352 | -32.9221 | 2.006437 | 0.964215 | -0.45584 |
| 杨艳 OS.jpg      | -1.09184 | -0.2358  | -2.62239 | 0.761752 | -34.1818 | 2.029733 | -0.73846 | 0.574011 |
| 杨行健 OD.jpg     | 1.082201 | 0.099274 | 1.161108 | -0.62419 | 14.98663 | -20.6579 | 0.342215 | -0.75305 |
| 杨鹏鑫 OD.jpg     | 1.26311  | -0.2559  | 2.254917 | -0.5598  | 33.86089 | 1.190297 | 2.308994 | 0.112061 |
| 杨鹏鑫 OS.jpg     | 0.000311 | -0.0064  | -0.45421 | -1.00501 | -14.5638 | -11.0152 | -0.17099 | -0.37133 |
| 格桑央吉<br>OD.jpg | 0.09483  | 0.160372 | 0.41687  | -0.17839 | -13.735  | 2.560306 | -0.52826 | -0.44304 |
| 格桑央吉<br>OS.jpg | -0.00504 | 0.022203 | 0.902421 | 0.511493 | 7.240921 | 20.77941 | -0.38801 | -0.40966 |
| 格罗不西<br>OD.jpg | 0.951164 | 0.046754 | 1.958571 | -0.14786 | 58.62836 | -5.98707 | 1.171765 | -0.49506 |
| 格罗不西<br>OS.jpg | 0.181743 | -0.01648 | 0.505633 | -0.53763 | -4.48043 | -10.2379 | 0.108563 | -0.59803 |

|            |          |          |          |          |          |          |          |          |
|------------|----------|----------|----------|----------|----------|----------|----------|----------|
| 梁锦东 OD.jpg | -0.22963 | 0.07275  | 1.035273 | 0.725547 | 21.51229 | -0.46198 | -0.96127 | -0.18777 |
| 梁锦东 OS.jpg | -0.11824 | 0.455429 | -0.11607 | -0.55584 | -31.904  | 3.45513  | -0.05346 | -0.06717 |
| 樊萌 OD.jpg  | 0.286666 | 0.113404 | -0.82284 | -0.68373 | -23.5748 | -5.83527 | -1.13352 | 0.026721 |
| 樊萌 OS.jpg  | -0.25346 | 0.317163 | 2.375034 | 1.364087 | -5.8675  | 29.73504 | 0.308989 | -0.04914 |
| 母延强 OD.jpg | 0.330297 | 0.015023 | 0.211328 | -0.31616 | -14.3434 | 6.043149 | -0.08936 | -0.52905 |
| 母延强 OS.jpg | 1.625541 | -0.21634 | 1.278181 | -0.81856 | 48.99484 | -41.8576 | 1.621915 | -0.4285  |
| 毛金凤 OD.jpg | 1.117999 | -0.00749 | 1.493165 | -0.54562 | 85.11181 | -49.7672 | 2.102089 | -0.03284 |
| 毛金凤 OS.jpg | -0.57985 | -0.27592 | -0.65552 | 0.367059 | -20.1492 | -7.38022 | -1.04336 | -0.05851 |
| 汪圣 OD.jpg  | -0.99684 | -0.07877 | -2.30287 | 0.923927 | -33.6301 | 1.672801 | -1.30808 | 0.613995 |
| 汪圣 OS.jpg  | -0.14353 | 0.102178 | 0.515188 | 0.584244 | -14.4634 | 27.76826 | -0.19737 | -0.49248 |
| 温皓然 OD.jpg | -0.92425 | 0.082033 | -2.11185 | -0.09078 | -32.9354 | 1.692446 | -0.89007 | 0.360877 |
| 温皓然 OS.jpg | -0.64563 | 0.109147 | -1.77192 | -0.52511 | -33.3862 | 1.767379 | -0.89066 | 0.014632 |
| 游敏 OD.jpg  | 0.773831 | 0.105109 | 3.265312 | 0.555447 | 41.80132 | 23.76282 | 1.806382 | 0.005602 |
| 游敏 OS.jpg  | -1.18027 | -0.22761 | 1.070177 | 1.810775 | -30.0595 | 0.935584 | -0.68807 | 0.264919 |
| 熊伟 OD.jpg  | -0.26665 | 0.236006 | -0.73732 | -1.08171 | -31.6449 | 1.081124 | -0.10272 | -0.12083 |
| 熊伟 OS.jpg  | -0.15866 | 0.053594 | -0.6485  | -0.62103 | -28.576  | -1.16007 | -0.52305 | -0.46306 |
| 熊海军 OD.jpg | 0.340773 | 0.061821 | 1.152844 | 0.255491 | 12.72407 | 40.19457 | 0.570024 | -0.5505  |
| 熊海军 OS.jpg | -0.54885 | -0.00571 | -0.40728 | 0.635188 | -18.5812 | 17.40495 | -0.60386 | -0.11302 |
| 熊睿涵 OD.jpg | 0.400159 | 0.246973 | 1.538479 | -0.1422  | 19.93079 | 15.12666 | -0.09381 | -0.67456 |
| 牟建辉 OD.jpg | 1.278435 | 0.036054 | 2.055434 | -0.30489 | 102.7709 | -46.7642 | 1.513118 | -0.26355 |
| 牟建辉 OS.jpg | 0.75837  | 0.22204  | 1.713746 | 0.228723 | 45.79777 | 8.126849 | 0.673928 | -0.55657 |
| 王久阳 OD.jpg | -0.68415 | 0.116176 | -1.55149 | -0.3286  | -31.596  | 0.292073 | -0.80114 | 0.19837  |
| 王久阳 OS.jpg | -0.57448 | 0.27016  | -0.94692 | 0.037695 | -31.7563 | -0.11993 | -1.23481 | 0.50278  |
| 王城 OS.jpg  | -0.25223 | 0.210408 | -0.55723 | -0.15797 | -30.3876 | 2.043439 | -0.82615 | -0.19407 |
| 王宇航 OD.jpg | -0.07925 | 0.098831 | 0.215716 | 0.290856 | 5.718137 | 42.6485  | 0.078108 | -0.58048 |

|            |          |          |          |          |          |          |          |          |
|------------|----------|----------|----------|----------|----------|----------|----------|----------|
| 王宇航 OS.jpg | 1.579588 | -0.13913 | 3.043894 | -0.17728 | 72.08575 | 34.91977 | 2.817243 | 0.620378 |
| 王宇轩 OD.jpg | -1.13127 | -0.20161 | -2.20475 | 0.582849 | -34.1387 | 1.669955 | -0.9114  | 0.379592 |
| 王宇轩 OS.jpg | -0.66867 | -0.16208 | -1.36481 | -0.34518 | -29.5962 | -0.73428 | -0.56538 | -0.04766 |
| 王慧超 OD.jpg | 0.685854 | 0.178464 | 2.4284   | 0.015574 | 25.69472 | 67.39354 | 1.038026 | -0.26304 |
| 王慧超 OS.jpg | -0.33174 | 0.346357 | -1.41822 | -0.99509 | -32.4298 | 1.080495 | -1.0408  | 0.444357 |
| 王成杰 OD.jpg | -0.01063 | 0.026103 | -0.33551 | -0.74177 | -28.0692 | -0.67659 | -0.28327 | -0.47513 |
| 王成杰 OS.jpg | -1.04851 | -0.12407 | -2.69733 | 0.891228 | -34.8051 | 1.843591 | -0.82115 | 0.307208 |
| 王李胜 OS.jpg | 0.437002 | 0.003879 | 0.414193 | -0.67305 | -10.6542 | -5.61554 | -0.08661 | -0.60756 |
| 王杰 OS.jpg  | -0.8392  | 0.020416 | -1.95898 | 0.657593 | -33.5082 | 2.209194 | -1.13233 | 0.291997 |
| 王梦阳 OS.jpg | 1.261869 | -0.09008 | -0.44236 | -1.39865 | -29.3578 | 0.842511 | 2.080722 | 0.240499 |
| 王洪武 OD.jpg | 0.279819 | 0.270835 | 0.356035 | -0.15421 | -20.25   | -2.81707 | -0.67982 | -0.48424 |
| 王洪武 OS.jpg | -0.33131 | 0.235326 | -0.92179 | -0.59611 | -32.3193 | 2.979729 | 0.772042 | -0.51981 |
| 王瑞 OD.jpg  | 1.26249  | -0.02914 | 2.28417  | -0.60296 | 96.37508 | -59.6559 | 1.169456 | -0.4244  |
| 王瑞 OS.jpg  | 1.291957 | -0.0679  | 0.410913 | -1.06233 | -13.9232 | -6.23813 | 1.654087 | -0.3776  |
| 王英 OD.jpg  | 0.297534 | 0.139706 | 0.281706 | -0.46379 | 12.68468 | 7.343067 | 0.46571  | -0.67599 |
| 王英 OS.jpg  | -0.64822 | -0.09081 | -1.76038 | -0.16215 | -32.056  | 0.971816 | -0.83151 | 0.268265 |
| 王茹琳 OD.jpg | 1.239165 | -0.07523 | 2.198162 | -0.53152 | 95.79556 | -53.4139 | 1.778766 | -0.29763 |
| 王薛雯 OD.jpg | 1.59128  | -0.10581 | 2.472653 | -0.12669 | 86.2804  | 15.91808 | 1.233654 | -0.43558 |
| 王谦 OD.jpg  | 0.048371 | 0.155061 | 0.978477 | 0.278353 | 5.414158 | 22.19423 | 0.192755 | -0.64659 |
| 王谦 OS.jpg  | 1.783702 | -0.25045 | 7.594462 | 2.16905  | 241.965  | 75.79364 | 3.23137  | 1.90603  |
| 王鹏 OD.jpg  | -0.47342 | -0.00451 | -0.54361 | 0.186203 | -22.2976 | -1.66061 | -0.54305 | -0.19201 |
| 王鹏 OS.jpg  | 0.029596 | 0.008441 | -0.66432 | -0.81762 | -26.9171 | 5.310861 | 1.024862 | -0.40981 |
| 甘东升 OS.jpg | 1.91207  | -0.26021 | 1.311281 | -0.87003 | -15.3733 | 9.143315 | 2.319198 | 0.223218 |
| 甘甜 OD.jpg  | -0.68789 | 0.190831 | 0.105729 | 1.027361 | -28.0114 | 8.584624 | -0.88935 | 0.471039 |
| 甘甜 OS.jpg  | -0.59645 | 0.289457 | 0.216245 | 0.474256 | -26.7051 | 2.790634 | -0.78289 | 0.128442 |

|                |          |          |          |          |          |          |          |          |
|----------------|----------|----------|----------|----------|----------|----------|----------|----------|
| 祝浩鸿 OD.jpg     | 1.428906 | -0.13056 | 1.925238 | -0.08463 | 37.3114  | 75.21882 | 1.923517 | 0.073413 |
| 祝浩鸿 OS.jpg     | 1.057889 | 0.134621 | 0.699346 | -0.81464 | -8.73003 | 26.84741 | -0.21621 | -0.081   |
| 程潇 OD.jpg      | -0.38708 | -0.00686 | 0.042316 | 0.35034  | -15.4026 | 1.537256 | -0.92147 | -0.16701 |
| 程潇 OS.jpg      | -1.1121  | -0.14064 | -2.0949  | 0.183026 | -34.5062 | 1.72487  | -1.22042 | 0.629461 |
| 罗伯羽 OS.jpg     | 0.260197 | 0.131548 | 0.589273 | -0.27665 | -2.02845 | 7.149691 | -0.31267 | -0.3787  |
| 罗奇 OD.jpg      | -0.96212 | -0.09384 | -2.27493 | 0.420411 | -33.9656 | 2.259474 | -0.8126  | 0.395451 |
| 罗奇 OS.jpg      | -0.09825 | 0.073219 | -0.35814 | -0.07978 | -27.2195 | 7.645359 | 0.524069 | -0.16001 |
| 罗文笔 OD.jpg     | 1.141355 | -0.03487 | 2.664002 | -0.08671 | 44.19982 | -15.8326 | 1.853005 | 0.518241 |
| 罗文笔 OS.jpg     | 0.811709 | 0.212181 | 3.026021 | -0.09438 | 105.9621 | -49.0458 | 1.636526 | 0.469043 |
| 罗松曲措<br>OD.jpg | 0.367472 | 0.226266 | 0.663702 | -0.19911 | 11.47609 | 26.69128 | 0.745929 | -0.6663  |
| 罗松曲措<br>OS.jpg | 1.47115  | -0.04988 | 1.519519 | -0.71707 | 5.14582  | 30.85867 | 2.339092 | 0.205351 |
| 罗森 OD.jpg      | 0.662497 | 0.112027 | 2.554286 | 0.018921 | 61.59937 | -17.2724 | 1.365769 | -0.36861 |
| 罗森 OS.jpg      | -0.83091 | -0.12746 | -0.66014 | 0.942528 | -24.835  | 8.758039 | -0.53205 | -0.0915  |
| 罗维壹 OD.jpg     | 0.021087 | 0.107229 | 0.806624 | 0.347254 | 0.563021 | 37.60463 | 0.04833  | -0.55179 |
| 罗维壹 OS.jpg     | -0.67293 | -0.13808 | -0.69219 | 0.196898 | -30.0953 | 1.622427 | -1.06047 | 0.174364 |
| 肖宇航 OD.jpg     | 0.180909 | 0.141495 | 0.238976 | -0.44475 | 4.929911 | -10.4607 | -0.34593 | -0.44614 |
| 肖松 OD.jpg      | 0.381668 | 0.193493 | 2.842595 | 1.191655 | 36.77128 | 49.76101 | 0.706164 | -0.41384 |
| 肖松 OS.jpg      | -0.87495 | -0.291   | -1.91157 | -0.31435 | -32.3299 | 0.691522 | -0.85586 | 0.088607 |
| 肖涛鲋 OD.jpg     | 0.245876 | 0.071961 | -0.40127 | -0.76393 | -28.5409 | -0.25353 | -0.51532 | -0.57616 |
| 肖涛鲋 OS.jpg     | 0.853451 | 0.047768 | -0.16905 | -0.95511 | -4.54332 | -17.4606 | -0.24081 | -0.54268 |
| 胡桃 OD.jpg      | -0.45567 | 0.078416 | -1.75503 | -0.18766 | -32.791  | 2.318138 | -0.41014 | -0.3193  |
| 胡桃 OS.jpg      | -0.48487 | -0.05146 | 0.235302 | 0.962087 | -9.67312 | 28.83068 | -0.6442  | -0.09917 |
| 胡鑫月 OD.jpg     | -0.15109 | 0.010723 | 0.399347 | -0.3543  | 11.24373 | -31.158  | -0.61209 | -0.2915  |

|            |          |          |          |          |          |          |          |          |
|------------|----------|----------|----------|----------|----------|----------|----------|----------|
| 胡鑫月 OS.jpg | -0.40514 | -0.11852 | -1.53179 | -0.63029 | -30.663  | -1.3671  | -0.87128 | 0.097014 |
| 胡馨怡 OS.jpg | -1.07762 | -0.176   | -2.21605 | 0.217951 | -34.6768 | 1.505289 | -1.15512 | 0.500445 |
| 苏航 OD.jpg  | 2.187631 | -0.48028 | 3.909767 | -0.40156 | 186.6434 | -53.6959 | 3.786598 | 1.575007 |
| 苏航 OS.jpg  | 0.040352 | 0.021674 | 0.393571 | -0.29087 | -8.00669 | -7.77965 | -0.12402 | -0.42399 |
| 莫红 OD.jpg  | 0.512523 | 0.074925 | -0.04006 | -0.64487 | -7.68393 | -17.8326 | -0.34929 | -0.40048 |
| 莫红 OS.jpg  | -0.21964 | 0.059395 | 0.029646 | 0.275978 | 7.363583 | -12.1672 | -0.70869 | 0.004769 |
| 蒋骑谦 OD.jpg | 0.229888 | 0.163126 | 2.682514 | 0.715307 | 26.19406 | -14.0241 | 0.490494 | -0.45258 |
| 蒋骑谦 OS.jpg | -1.09269 | -0.15009 | -2.21783 | -0.06084 | -33.4245 | 1.366697 | -1.09419 | 0.421129 |
| 虞昊 OD.jpg  | 0.096355 | 0.089209 | 0.323553 | -0.14683 | 12.51701 | -29.6275 | -0.96984 | -0.09818 |
| 虞昊 OS.jpg  | -0.82693 | -0.13585 | -2.22259 | 0.410994 | -32.7714 | 1.525164 | -0.71344 | 0.309174 |
| 袁铭浙 OD.jpg | -0.75189 | -0.24755 | -1.12437 | 1.260175 | -27.4346 | 4.182706 | -0.67491 | 0.043404 |
| 袁铭浙 OS.jpg | -0.80667 | -0.06428 | -1.41658 | 0.807224 | -27.1038 | 1.228078 | -0.76994 | 0.073191 |
| 许羽洁 OD.jpg | 1.278169 | -0.01993 | 1.904068 | -0.58609 | 78.03453 | -31.5818 | 1.354238 | -0.32521 |
| 许羽洁 OS.jpg | 1.728187 | -0.14407 | 2.886091 | -0.17868 | 90.10239 | -76.4665 | 1.91561  | 0.623033 |
| 许馨雅 OD.jpg | 0.206282 | 0.045006 | 1.483573 | 0.05709  | 34.36011 | -14.8774 | 0.472057 | -0.41286 |
| 谢喆暄 OD.jpg | 0.870233 | 0.066604 | 3.500443 | 0.664764 | 37.666   | -4.50553 | 2.323029 | 0.654074 |
| 谢喆暄 OS.jpg | -0.62    | -0.10895 | -1.22292 | -0.50055 | -28.5507 | -1.53528 | -0.72586 | -0.03355 |
| 谢子航 OD.jpg | 0.72503  | 0.084307 | 1.097359 | 0.157217 | 1.247653 | 45.25853 | 1.066829 | -0.25966 |
| 谢子航 OS.jpg | -0.62266 | 0.074953 | -1.42412 | -0.12171 | -32.3746 | 2.18449  | -0.77611 | 0.023937 |
| 谢洪艳 OD.jpg | -0.37485 | -0.14967 | -0.53493 | 0.451159 | -17.0992 | 28.76792 | -0.28923 | -0.13646 |
| 谢洪艳 OS.jpg | 1.781957 | -0.29447 | 3.129822 | -0.18417 | 104.9805 | -28.0338 | 3.046531 | 1.200875 |
| 谢贤贤 OD.jpg | -0.81221 | 0.31051  | -2.0449  | 0.17108  | -34.5858 | 1.500098 | -1.14068 | 0.886344 |
| 贾宇果 OD.jpg | 0.247387 | 0.083376 | 0.236711 | -0.87028 | 1.796164 | -22.5564 | -0.20022 | -0.51118 |
| 贾宇果 OS.jpg | -0.87193 | 0.005149 | -1.53124 | 0.513988 | -26.3731 | -5.72752 | -1.15986 | 0.449609 |
| 赖小萍 OD.jpg | -0.87181 | -0.10378 | -0.84326 | 1.008005 | -27.6808 | 3.191679 | -1.03461 | 0.264965 |

|            |          |          |          |          |          |          |          |          |
|------------|----------|----------|----------|----------|----------|----------|----------|----------|
| 赖小萍 OS.jpg | 0.020395 | 0.424704 | 2.415064 | 0.98895  | 63.47914 | -11.7723 | 0.793146 | 0.199336 |
| 赵净叶 OD.jpg | -0.03225 | -0.03123 | 0.465343 | -0.34233 | 6.176393 | -3.33474 | 0.145887 | -0.5399  |
| 赵宇豪 OD.jpg | -0.52993 | -0.04904 | -0.58099 | 0.412335 | -21.4969 | 6.303892 | -0.76443 | -0.10464 |
| 赵宇豪 OS.jpg | -0.47221 | 0.006322 | -0.59376 | 0.700389 | -23.9403 | 7.261138 | -0.61587 | -0.26376 |
| 赵志刚 OD.jpg | 0.862729 | -0.01466 | 1.466048 | -0.54527 | 46.1764  | -40.6544 | 0.717634 | -0.56984 |
| 赵志刚 OS.jpg | -0.49105 | -0.25879 | -0.36233 | -0.30466 | -21.1943 | -6.34785 | -1.14228 | 0.131946 |
| 赵振宇 OS.jpg | -0.81509 | 0.138703 | -1.87735 | 0.36234  | -33.1969 | 1.494506 | -0.80303 | 0.255266 |
| 赵琴 OD.jpg  | -0.75305 | -0.09341 | -1.05536 | 0.707109 | -27.8113 | 2.708698 | -0.53805 | -0.14986 |
| 赵琴 OS.jpg  | -0.93838 | -0.23767 | -2.26002 | 0.287685 | -33.019  | 1.338597 | -0.73154 | 0.037458 |
| 邹博文 OD.jpg | -0.3821  | -0.11046 | 0.507035 | 0.607483 | 0.581588 | 0.540394 | -0.62851 | -0.33235 |
| 邹博文 OS.jpg | 0.419069 | 0.076717 | -0.82194 | -1.35621 | -24.9688 | -1.59941 | 0.152014 | -0.56767 |
| 邹洁 OD.jpg  | -1.19413 | -0.25716 | -2.17235 | 0.323453 | -33.4419 | -0.39693 | -0.91918 | 0.392328 |
| 邹洁 OS.jpg  | 0.484633 | 0.223807 | 1.310863 | -0.4395  | 58.94096 | -59.0567 | 0.279269 | -0.64029 |
| 邹玉 OD.jpg  | 0.445557 | 0.137503 | 1.30758  | -0.1967  | 11.97833 | 14.09425 | 0.664173 | -0.59137 |
| 邹玉 OS.jpg  | -0.76619 | -0.1053  | -1.18927 | 0.312434 | -31.6174 | 2.257245 | -0.91482 | -0.03421 |
| 邹玲 OD.jpg  | 0.048549 | 0.04382  | 1.139007 | -0.09367 | 18.07288 | -2.93296 | 0.565903 | -0.5741  |
| 邹玲 OS.jpg  | -0.8451  | -0.22246 | -1.03245 | 0.498977 | -24.3868 | -2.4003  | -0.7101  | -0.07182 |
| 郭友宝 OD.jpg | -0.42704 | 0.204084 | -0.1006  | -0.06663 | -19.2004 | -3.02349 | -0.81299 | -0.06344 |
| 郭广城 OD.jpg | 0.305111 | -0.02035 | 0.738759 | -0.5203  | 24.35928 | -41.5242 | -0.11323 | -0.59297 |
| 郭晓佳 OD.jpg | 0.292044 | 0.028812 | 0.992978 | -0.03773 | 8.40991  | -1.79459 | 0.4466   | -0.56052 |
| 郭江林 OD.jpg | -0.95572 | -0.07624 | -1.80406 | 0.197105 | -32.2984 | 1.900999 | -1.26926 | 0.58941  |
| 郭江林 OS.jpg | -0.70232 | 0.022129 | -0.61437 | 0.916054 | -24.1812 | 12.27113 | -0.74276 | 0.250621 |
| 鄢慧 OD.jpg  | -0.15565 | 0.007396 | -0.55172 | -0.63221 | -19.9623 | -9.33671 | -0.6187  | -0.25325 |
| 鄢慧 OS.jpg  | -0.92713 | 0.129333 | -1.86669 | -0.42947 | -33.2268 | 1.53706  | -0.65935 | -0.25529 |
| 钟宇 OD.jpg  | 0.391478 | 0.04293  | 2.047769 | 0.302608 | 27.75501 | 19.40709 | 1.041034 | -0.33262 |

|            |          |          |          |          |          |          |          |          |
|------------|----------|----------|----------|----------|----------|----------|----------|----------|
| 钟宇 OS.jpg  | -0.62304 | -0.08059 | -1.02458 | -0.03963 | -28.3848 | 0.629029 | -0.81799 | 0.185504 |
| 钱辉宇 OD.jpg | -0.59182 | -0.25622 | -1.79186 | 0.339904 | -30.4331 | 0.338512 | -0.74244 | 0.071473 |
| 钱辉宇 OS.jpg | 1.055949 | 0.029864 | 1.768637 | -0.22485 | -5.66454 | 41.10475 | 1.312366 | -0.08901 |
| 陈义新 OD.jpg | 1.221354 | 0.068709 | 9.911907 | 3.688249 | 389.1591 | 165.9567 | 2.648212 | 1.895684 |
| 陈义新 OS.jpg | 0.173029 | -0.05472 | 0.389394 | -0.24154 | -17.3423 | 22.7891  | 1.165603 | -0.42668 |
| 陈力锋 OD.jpg | -0.53354 | -0.16668 | -0.23613 | 0.196163 | 5.785443 | -27.4734 | -0.89946 | -0.01063 |
| 陈力锋 OS.jpg | 0.070379 | 0.199265 | -0.89491 | -1.16928 | -30.9686 | 1.262698 | -0.26439 | -0.40201 |
| 陈嘉强 OD.jpg | -0.16791 | 0.307768 | 0.22871  | 0.389172 | -17.0891 | 16.12479 | -0.52231 | -0.03749 |
| 陈嘉强 OS.jpg | -0.07879 | 0.060621 | -1.1052  | -0.58072 | -29.6092 | -0.88505 | -1.18644 | 0.272974 |
| 陈家豪 OD.jpg | 0.251478 | 0.044974 | -0.07841 | -0.46637 | -26.9437 | 0.774644 | -0.25817 | -0.42554 |
| 陈家豪 OS.jpg | 0.814451 | 0.032476 | 1.599856 | -0.60542 | 49.43352 | -42.7652 | 0.698229 | -0.5326  |
| 陈庆玲 OD.jpg | 0.321565 | -0.01395 | 0.27099  | -1.01411 | -17.9182 | -5.17362 | -0.08228 | -0.59068 |
| 陈庆玲 OS.jpg | -0.10699 | 0.20384  | -0.99109 | -0.81133 | -29.0246 | 1.796733 | -0.15438 | -0.45698 |
| 陈思同 OD.jpg | 0.567869 | 0.053459 | 0.906966 | -0.60085 | 9.646607 | -21.3489 | 0.544974 | -0.51618 |
| 陈思同 OS.jpg | -0.64804 | -0.0852  | -1.0565  | -0.46668 | -29.4967 | -2.25239 | -1.10899 | 0.025965 |
| 陈思潼 OD.jpg | -1.02552 | -0.12223 | -1.79666 | 0.720114 | -32.9266 | 3.11142  | -1.12694 | 0.553314 |
| 陈思潼 OS.jpg | -0.84167 | 0.09159  | -1.14997 | 0.729887 | -33.4541 | 2.39701  | -1.06239 | 0.045493 |
| 陈晓宇 OD.jpg | -0.59904 | 0.038007 | -1.75671 | -0.24986 | -32.6057 | 0.980698 | -1.06297 | 0.131331 |
| 陈晓宇 OS.jpg | 1.581993 | -0.27467 | 2.073371 | -0.8303  | 78.42945 | -55.2859 | 2.167282 | 0.069716 |
| 陈松屹 OD.jpg | -0.27976 | -0.16151 | -1.40164 | -0.17055 | -31.4145 | 0.487573 | -1.06334 | -0.08289 |
| 陈松屹 OS.jpg | -0.89004 | -0.16412 | -2.23139 | 0.143747 | -33.7465 | 1.781311 | -1.2751  | 0.637642 |
| 陈柯宇 OD.jpg | -1.08646 | -0.19353 | -2.41032 | 1.064442 | -33.7343 | -0.3209  | -0.83394 | 0.597171 |
| 陈柯宇 OS.jpg | -0.90201 | -0.07665 | -2.03943 | -0.2078  | -31.9167 | -0.97335 | -1.0745  | 0.504794 |
| 陈江川 OD.jpg | 1.392242 | -0.00874 | 6.749982 | 2.066612 | 273.3461 | 80.34848 | 2.407046 | 1.313869 |
| 陈江川 OS.jpg | -0.21695 | 0.071808 | 1.140818 | 0.330776 | -17.3139 | 1.48439  | -0.02162 | -0.44431 |



|            |          |          |          |          |          |          |          |          |
|------------|----------|----------|----------|----------|----------|----------|----------|----------|
| 陈洪飞 OD.jpg | 0.711394 | 0.240776 | -0.61841 | -0.66125 | -21.8052 | -7.68646 | -1.06466 | 0.150419 |
| 陈洪飞 OS.jpg | -0.44166 | 0.243118 | -1.93174 | -0.48265 | -32.1014 | -0.70549 | -0.97716 | 0.826099 |
| 陈睿峰 OD.jpg | -0.8688  | -0.12912 | -1.44499 | 0.249612 | -32.3651 | 2.398367 | -1.29798 | 0.528485 |
| 陈睿峰 OS.jpg | 1.106946 | 0.048802 | 1.677257 | -0.35067 | 38.40217 | -20.1848 | 1.204706 | -0.5262  |
| 陈锐翔 OD.jpg | 0.130736 | 0.191642 | 0.998342 | 0.070353 | 13.30252 | -16.7156 | -0.20507 | -0.46192 |
| 陶凯 OD.jpg  | -1.02138 | -0.17173 | -2.57568 | 1.14292  | -34.5432 | 2.093867 | -0.91357 | 0.319215 |
| 陶凯 OS.jpg  | 1.899006 | -0.28296 | 4.293691 | 0.58209  | 101.6504 | 39.56372 | 3.246432 | 1.408179 |
| 雷顺龙 OD.jpg | -0.60589 | 0.11028  | -0.31884 | 1.005101 | -31.2434 | 2.513258 | -0.81593 | -0.06287 |
| 雷顺龙 OS.jpg | 1.09188  | -0.06528 | 2.224121 | 0.302675 | 48.67565 | 78.61333 | 2.242897 | 0.063373 |
| 霍寿涛 OD.jpg | -0.33027 | 0.001845 | 0.539439 | 0.40538  | -9.38315 | -6.8148  | -0.30998 | -0.49357 |
| 霍寿涛 OS.jpg | -0.36962 | 0.02248  | -0.41848 | -0.38128 | -27.6511 | 1.216508 | -0.2415  | -0.54998 |
| 靳浩宇 OD.jpg | -0.02821 | 0.08808  | -0.27067 | -0.63705 | -23.4711 | -0.64224 | 0.695397 | -0.61282 |
| 靳浩宇 OS.jpg | -0.4983  | 0.21661  | -0.33736 | -0.27962 | -28.6919 | 5.94547  | -0.66185 | 0.190192 |
| 韩靖雅 OD.jpg | -0.47705 | -0.21202 | -0.11187 | 0.66881  | -14.0008 | 9.966891 | -0.78121 | -0.1216  |
| 韩靖雅 OS.jpg | -0.6051  | -0.19646 | -1.6227  | -0.48216 | -31.4636 | -0.2376  | -0.87447 | 0.168797 |
| 马博文 OD.jpg | 0.469996 | 0.114115 | 1.065086 | -0.72291 | 23.19586 | -28.7225 | -0.23173 | -0.59044 |
| 马博文 OS.jpg | -0.92424 | -0.05656 | -1.2137  | -0.07374 | -32.4126 | 1.392816 | -1.02654 | 0.037208 |
| 马源 OD.jpg  | 1.316895 | -0.02969 | 2.592055 | -0.24896 | 58.2161  | 0.389145 | 1.144373 | -0.45213 |
| 马源 OS.jpg  | 0.453308 | 0.123115 | 1.232661 | -0.34945 | 56.52395 | -44.2448 | -0.13425 | -0.54238 |
| 马潇 OD.jpg  | 1.994501 | -0.37038 | 2.439648 | -0.63485 | 94.64118 | -62.3564 | 2.405545 | 0.109065 |
| 马潇 OS.jpg  | 0.983949 | -0.05061 | -0.07681 | -1.29639 | -19.7937 | -7.76586 | 0.942803 | -0.52211 |
| 马霜 OD.jpg  | 0.49289  | 0.354785 | 0.348438 | -0.25273 | -3.74801 | -18.8711 | -0.90034 | 0.302487 |
| 马霜 OS.jpg  | 0.107711 | 0.419453 | -1.82041 | -0.52022 | -32.0633 | -0.18873 | -1.2362  | 1.050309 |
| 高梓焱 OD.jpg | -0.42709 | 0.192134 | -0.25486 | 0.228516 | -29.5821 | 7.393421 | -0.79406 | 0.006201 |
| 高梓焱 OS.jpg | 0.471358 | 0.136234 | 0.818002 | -0.27736 | -17.6681 | 22.28195 | 0.694287 | -0.34234 |

|            |          |          |          |          |          |          |          |          |
|------------|----------|----------|----------|----------|----------|----------|----------|----------|
| 高翊馨 OD.jpg | 0.062209 | 0.099859 | -0.66738 | -0.87455 | -24.4266 | -4.84597 | 0.366147 | -0.7097  |
| 高翊馨 OS.jpg | -0.57725 | -0.04176 | -1.49052 | -0.4491  | -31.3652 | 3.27719  | -0.18565 | -0.41918 |
| 高贺超 OD.jpg | -0.87626 | -0.09304 | -2.05316 | 0.647559 | -32.8874 | 1.322187 | -0.83932 | 0.331707 |
| 高贺超 OS.jpg | -0.66042 | 0.224645 | -1.03949 | -0.00684 | -33.1628 | 1.374492 | -0.57754 | -0.12425 |
| 魏嘉奕 OD.jpg | -0.67926 | -0.03996 | -0.77837 | 0.879439 | -21.1981 | 7.275719 | -0.67738 | 0.072277 |
| 魏嘉奕 OS.jpg | -0.28206 | -0.05834 | -1.65863 | -0.69662 | -31.2037 | 0.164833 | -1.20564 | 0.273119 |
| 魏巍 OD.jpg  | -0.9514  | -0.17711 | -1.49665 | 0.774536 | -31.0983 | 2.077439 | -0.76586 | 0.319578 |
| 魏巍 OS.jpg  | -0.62693 | -0.02967 | 0.692807 | 1.349459 | -9.93086 | 21.0998  | -0.61493 | -0.00761 |
| 魏忠泰 OD.jpg | -0.76539 | -0.1524  | -1.03634 | 0.887175 | -28.9853 | -0.32715 | -1.21067 | 0.272639 |
| 魏忠泰 OS.jpg | -0.87335 | -0.15216 | -2.03071 | 0.123739 | -32.8055 | 0.579668 | -0.95754 | 0.208605 |
| 魏文浩 OD.jpg | -0.69851 | -0.20364 | -1.58487 | 0.223118 | -31.5821 | -0.26786 | -0.71676 | 0.160152 |
| 魏文浩 OS.jpg | 0.749359 | 0.018676 | 1.129121 | -0.81479 | 37.20789 | -46.1524 | 0.819596 | -0.53834 |
| 魏鹏 OS.jpg  | -0.29304 | 0.062691 | 0.731064 | 1.002844 | 17.41067 | 57.39699 | -0.52295 | -0.27318 |
| 黄博 OD.jpg  | 0.859304 | 0.014647 | 1.699276 | -0.29048 | 57.04415 | -42.3435 | 0.914812 | -0.54166 |
| 黄博 OS.jpg  | 1.408847 | -0.14731 | 2.005241 | -0.546   | 46.99514 | -29.0124 | 0.948351 | -0.45582 |
| 黄定鹏 OD.jpg | 0.018227 | 0.181603 | -0.28321 | -0.50041 | -19.4896 | -10.0042 | -1.1175  | 0.157683 |
| 黄定鹏 OS.jpg | 1.926618 | -0.35525 | 1.871085 | -0.91526 | 81.94122 | -54.2211 | 1.543019 | -0.10891 |
| 黄曾杰 OD.jpg | 1.229752 | 0.128769 | 1.49096  | -0.70583 | -20.0951 | 16.94953 | 1.046577 | 0.255273 |
| 黄曾杰 OS.jpg | -0.57245 | 0.320333 | -1.33033 | -0.08176 | -33.5717 | 2.978667 | -1.11977 | 0.545288 |
| 黄林枫 OD.jpg | -0.09362 | 0.05456  | -0.24082 | -0.60688 | -2.42032 | -23.1703 | -0.7235  | -0.10142 |
| 黄诗琪 OD.jpg | -0.87656 | -0.20874 | -1.48652 | 1.188322 | -31.2235 | 4.232796 | -0.8318  | 0.271847 |
| 黄诗琪 OS.jpg | -0.78644 | 0.028062 | -1.39554 | 1.077622 | -32.7828 | 3.780975 | -1.14315 | 0.582075 |
| 龚钰凯 OD.jpg | -1.13642 | -0.26029 | -2.44742 | 0.622585 | -33.6936 | 1.499636 | -1.35002 | 0.729883 |
| 龚钰凯 OS.jpg | -0.61078 | -0.06592 | -1.70599 | -0.32762 | -31.6898 | 1.317396 | -0.74524 | -0.04004 |
| 曹粲 OD.jpg  | -0.27349 | 0.198729 | -0.15454 | -0.28269 | -7.19731 | -2.77209 | -0.76531 | -0.08396 |

|            |          |          |          |          |          |          |          |          |
|------------|----------|----------|----------|----------|----------|----------|----------|----------|
| 曹粲 OS.jpg  | -0.31869 | 0.009363 | -0.71923 | -0.15193 | -5.74996 | -0.49698 | 0.070371 | -0.22409 |
| 曹雪梅 OD.jpg | -0.40806 | 0.067558 | -0.42835 | -0.52357 | -6.92523 | 0.101274 | -0.51808 | 0.314876 |
| 曹雪梅 OS.jpg | -0.29823 | 0.06863  | -0.53782 | -0.39979 | -5.09003 | -1.17213 | -0.40317 | 0.222534 |
| 曹云峰 OD.jpg | -0.13406 | -0.19058 | -0.53902 | -0.45397 | -3.72399 | 0.508458 | -0.17781 | -0.05149 |
| 曹云峰 OS.jpg | 0.104768 | -0.08019 | 0.551866 | 0.153137 | -6.35419 | -1.63866 | -0.50367 | 0.275406 |
| 曹籽言 OD.jpg | 1.00288  | 0.15967  | 2.624053 | -0.2346  | 17.26526 | 2.024737 | -0.13106 | -0.62024 |
| 曹籽言 OS.jpg | 0.124354 | 0.162382 | 0.573435 | -0.63348 | -3.92494 | 0.347714 | -0.73449 | -0.22833 |
| 曾超 OD.jpg  | -0.02286 | 0.156866 | 0.219476 | -0.58549 | -5.87468 | -0.4277  | -0.4093  | -0.10224 |
| 曾超 OS.jpg  | -0.24026 | 0.046031 | -0.47332 | -0.31929 | -6.23694 | -1.58316 | -0.27769 | 0.212184 |
| 曾令萍 OD.jpg | 0.634881 | 0.135634 | 2.280847 | -0.15502 | -3.93543 | -0.71433 | -0.37716 | -0.37491 |
| 曾令萍 OS.jpg | 0.060857 | 0.155629 | 1.092764 | 0.811491 | -0.64254 | 3.92182  | 0.285094 | -0.21377 |
| 柴发玉 OD.jpg | -0.08086 | 0.023702 | -0.3425  | -0.42393 | -5.14653 | -3.08341 | -0.03144 | 0.356109 |
| 柴发玉 OS.jpg | 0.083586 | -0.0514  | 0.125519 | -0.78153 | -4.77138 | -2.60048 | -0.0908  | 0.19848  |
| 陈晨 OD.jpg  | 0.283619 | -0.03508 | 0.823895 | 0.589419 | -4.20695 | -1.97965 | 0.032752 | 0.040333 |
| 陈晨 OS.jpg  | -0.01897 | -0.07357 | -0.8818  | 0.484918 | 15.41041 | -14.5219 | 0.603493 | -0.48541 |
| 陈橙 OD.jpg  | -0.10356 | 0.174333 | 0.158976 | 0.024386 | 92.2406  | -4.07491 | 1.788522 | 0.448934 |
| 陈橙 OS.jpg  | -0.15613 | -0.03295 | 0.215657 | 0.526599 | -5.95447 | -1.06609 | -0.13236 | 0.143664 |
| 陈鸿竹 OD.jpg | -0.08676 | 0.071596 | 0.371966 | -0.07874 | -3.46856 | -1.14685 | 0.061503 | 0.108646 |
| 陈鸿竹 OS.jpg | -0.36444 | 0.01977  | -0.47428 | -0.51792 | -5.25902 | -0.95231 | -0.25913 | 0.153826 |
| 陈利 OD.jpg  | -0.11634 | -0.09689 | -0.97617 | 0.2463   | -2.11072 | -1.24407 | 0.572087 | -0.21194 |
| 陈利 OS.jpg  | -0.00201 | -0.18816 | -0.29631 | -0.17537 | 11.45716 | 8.902853 | 0.176793 | 0.033383 |
| 陈林 OD.jpg  | 0.000733 | -0.18378 | -0.09464 | -0.84862 | 0.385655 | -0.0267  | 0.001237 | -0.42781 |
| 陈林 OS.jpg  | 0.441965 | 0.120574 | 1.036858 | -0.95856 | -5.83477 | -2.73282 | -0.65973 | -0.05154 |
| 陈玲 OD.jpg  | 0.008742 | -0.14946 | 0.130417 | 0.044907 | -7.48217 | -3.07969 | -0.2307  | 0.586428 |
| 陈玲 OS.jpg  | -0.02621 | -0.27255 | -0.37525 | -0.61163 | -4.09491 | 0.781821 | -0.02021 | -0.0719  |

|            |          |          |          |          |          |          |          |          |
|------------|----------|----------|----------|----------|----------|----------|----------|----------|
| 陈晓芳 OD.jpg | -0.13507 | 0.009506 | -0.78342 | 0.217428 | -2.77462 | 3.32998  | 0.15746  | -0.42247 |
| 陈晓芳 OS.jpg | 0.065252 | 0.174296 | 0.067028 | -0.17333 | -2.61784 | 1.196357 | -0.11851 | -0.10221 |
| 陈瑜林 OD.jpg | -0.0888  | -0.11728 | -0.2915  | -0.07016 | -7.54962 | -2.40491 | -0.56652 | -0.04492 |
| 陈瑜林 OS.jpg | 0.578523 | -0.10396 | 0.763285 | -1.0968  | -0.85423 | 2.01853  | 0.776712 | -0.40831 |
| 陈昀 OD.jpg  | -0.11984 | -0.00551 | -0.41674 | -0.37654 | -5.52981 | -1.1242  | -0.42015 | 0.188543 |
| 陈昀 OS.jpg  | -0.08179 | -0.19388 | -0.59861 | -0.31126 | 2.6716   | -1.89383 | 0.10604  | -0.10552 |
| 程浩凌 OD.jpg | 0.064501 | -0.0181  | 0.261052 | 0.197135 | 0.925407 | -10.6636 | -0.04606 | -0.12437 |
| 程浩凌 OS.jpg | 0.2386   | 0.034126 | 1.216593 | 0.395736 | 1.048189 | 8.407184 | 0.339956 | -0.18282 |
| 程雨昕 OD.jpg | -0.18339 | 0.091111 | -0.4528  | 0.315327 | -4.10466 | -0.79411 | -0.12362 | 0.0175   |
| 程雨昕 OS.jpg | -0.1891  | 0.081678 | -0.39275 | 0.365371 | -0.63976 | 5.370692 | 0.085704 | -0.39485 |
| 达云萍 OD.jpg | -0.31169 | 0.296552 | 0.489219 | 0.969891 | -2.87328 | 0.042855 | 0.015711 | 0.03112  |
| 达云萍 OS.jpg | -0.42041 | 0.080271 | -0.39241 | 0.843173 | 0.847075 | 5.555261 | -0.24355 | -0.6824  |
| 代琳 OD.jpg  | -0.35277 | 0.037504 | -0.68341 | -0.23887 | -7.67707 | -2.59599 | -0.41425 | 0.594921 |
| 代琳 OS.jpg  | -0.33219 | 0.004132 | -0.99481 | 0.159422 | -5.67166 | -1.36338 | -0.29999 | 0.540722 |
| 代荣龙 OD.jpg | -0.0817  | 0.00583  | -0.24568 | 0.045863 | -0.00107 | 6.983464 | 0.044138 | 0.007364 |
| 代荣龙 OS.jpg | 0.000604 | 0.004382 | 1.167161 | -0.55927 | -2.67002 | 1.789642 | -0.04409 | 0.176314 |
| 邓水莲 OD.jpg | 1.040067 | -0.023   | 2.692963 | 0.118445 | -6.5155  | -2.94522 | -0.6095  | -0.14617 |
| 邓水莲 OS.jpg | 0.568919 | -0.18418 | 1.215658 | -0.5385  | -4.89011 | -1.3141  | -0.2942  | 0.107346 |
| 邓渝麒 OD.jpg | -0.07596 | -0.04188 | -0.24632 | -0.5745  | -7.241   | -1.7853  | -0.33012 | 0.082512 |
| 邓渝麒 OS.jpg | -0.19107 | -0.15501 | -0.71422 | -0.13482 | -3.69362 | -0.30801 | -0.50358 | -0.58153 |
| 范欢 OD.jpg  | 0.339724 | -0.0465  | 0.896994 | -0.25356 | 0.451925 | 3.888738 | 1.704183 | 0.364358 |
| 范欢 OS.jpg  | -0.21857 | 0.014466 | -0.6486  | 0.140564 | -6.17555 | -0.11184 | -0.57978 | 0.13679  |
| 范茂林 OD.jpg | -0.30026 | 0.112343 | -0.40088 | -0.01768 | -5.98545 | -1.20223 | -0.22081 | 0.118789 |
| 范茂林 OS.jpg | 0.079601 | -0.0037  | 0.718985 | 1.173804 | -5.85796 | -2.29546 | -0.20631 | 0.189109 |
| 冯莉萍 OD.jpg | -0.16741 | -0.10114 | -0.93451 | 0.101086 | -4.72662 | -1.09963 | 0.092034 | 0.070476 |

|            |          |          |          |          |          |          |          |          |
|------------|----------|----------|----------|----------|----------|----------|----------|----------|
| 冯莉萍 OS.jpg | 0.071867 | 0.115903 | 1.032238 | 0.997316 | -6.67678 | -2.39497 | -0.47439 | 0.352037 |
| 冯姝婷 OD.jpg | -0.28671 | -0.06457 | -0.95942 | 0.09901  | -2.56833 | 0.922409 | 0.144564 | -0.16849 |
| 冯姝婷 OS.jpg | 0.316248 | -0.0542  | 0.764627 | -0.43442 | -4.03499 | -1.30581 | 0.076171 | 0.020468 |
| 付琪琪 OD.jpg | 0.079355 | 0.032712 | 1.37512  | 0.910046 | 11.57537 | -3.20486 | 0.515851 | -0.40647 |
| 付琪琪 OS.jpg | -0.23663 | 0.12655  | -0.5217  | 0.191105 | -0.85693 | 4.819158 | 0.248365 | -0.07762 |
| 付勇超 OD.jpg | -0.15991 | -0.01608 | 0.070744 | 0.62615  | -4.01196 | 1.126852 | -0.62138 | -0.26231 |
| 付勇超 OS.jpg | -0.40453 | 0.041914 | -0.97155 | 0.088906 | 7.243578 | -5.45756 | 0.281548 | -0.23751 |
| 傅莉 OD.jpg  | -0.01773 | 0.147168 | 0.573145 | -0.02903 | -0.08431 | -0.4563  | 0.216092 | 0.053102 |
| 傅莉 OS.jpg  | -0.00488 | 0.061019 | -0.06683 | -0.40359 | -6.54098 | -2.65773 | -0.26846 | 0.624867 |
| 高霞 OD.jpg  | -0.13268 | -0.03074 | -0.33968 | 0.172218 | -4.57026 | 0.471225 | 0.299773 | -0.19768 |
| 高霞 OS.jpg  | -0.03649 | -0.10416 | 1.428251 | 1.035704 | -7.01047 | -1.75444 | -0.72486 | -0.04923 |
| 高妍君 OD.jpg | -0.02643 | -0.18375 | -0.4154  | -0.16716 | -3.05276 | -1.48669 | -0.67058 | -0.23291 |
| 高妍君 OS.jpg | -0.26033 | -0.09085 | 0.034852 | -1.11148 | -3.91916 | -3.33012 | -0.13544 | 0.29891  |
| 高媛 OD.jpg  | 0.069606 | -0.14901 | 0.781421 | 1.607263 | -2.2804  | 1.415725 | 0.23854  | -0.25193 |
| 高媛 OS.jpg  | -0.05048 | 0.1087   | 1.448299 | 1.670187 | -4.10901 | 1.700351 | -0.59174 | -0.54022 |
| 龚玲 OD.jpg  | -0.45196 | 0.085631 | -1.03408 | 0.141924 | 39.18455 | -26.1889 | 1.038571 | -0.28511 |
| 龚玲 OS.jpg  | 0.464904 | 0.151337 | 1.472734 | -0.60036 | 4.4977   | -3.47435 | -0.57458 | -0.31042 |
| 韩易 OD.jpg  | -0.24939 | -0.02504 | -0.31695 | -0.10732 | -5.21501 | -3.41357 | -0.65256 | -0.1206  |
| 韩易 OS.jpg  | -0.38599 | 0.165766 | -1.08184 | 0.245763 | -4.33239 | -1.66781 | -0.29274 | 0.482804 |
| 何春霖 OD.jpg | -0.19237 | 0.087035 | -0.68595 | 0.423651 | 3.533596 | 6.629112 | 0.275025 | -0.24717 |
| 何春霖 OS.jpg | -0.16372 | 0.069051 | -0.90822 | 0.418825 | -5.4444  | -2.18185 | -0.24667 | 0.335794 |
| 何璐 OD.jpg  | 1.453811 | 0.117798 | 3.370615 | 0.199279 | -3.12568 | 3.677759 | -0.04626 | -0.09079 |
| 何璐 OS.jpg  | -0.21279 | -0.1393  | -0.53536 | -0.38579 | -5.13852 | -1.20604 | -0.17067 | 0.164089 |
| 何苗 OD.jpg  | -0.16104 | -0.09851 | -0.54812 | 0.491743 | -2.51766 | 0.997714 | -0.16901 | 0.088298 |
| 何苗 OS.jpg  | -0.16594 | -0.12756 | -0.73281 | 0.426123 | -5.35349 | 0.209414 | -0.27731 | 0.188732 |

|            |          |          |          |          |          |          |          |          |
|------------|----------|----------|----------|----------|----------|----------|----------|----------|
| 何琪 OD.jpg  | -0.17778 | -0.03182 | -0.6418  | 0.133824 | 11.96635 | 11.8757  | 0.587109 | -0.35101 |
| 何琪 OS.jpg  | 0.483438 | -0.05133 | 2.248728 | 0.761304 | -5.06877 | -3.34215 | -0.09834 | 0.625684 |
| 何莎 OD.jpg  | 0.358664 | -0.08025 | 0.218449 | -0.38916 | -2.65816 | 2.378982 | -0.02417 | -0.10248 |
| 何莎 OS.jpg  | 0.067678 | 0.077105 | 0.488625 | 0.53652  | -1.41852 | 3.60407  | 0.14027  | -0.31828 |
| 何颖 OD.jpg  | -0.02376 | 0.045893 | 0.211419 | 0.453438 | -5.06604 | -0.6603  | 0.074663 | 0.190525 |
| 何颖 OS.jpg  | -0.07787 | -0.15711 | -0.58285 | 0.469248 | -6.14282 | -2.31231 | -0.11855 | 0.326664 |
| 贺娇娇 OD.jpg | 0.146024 | 0.158839 | 0.943891 | 0.415732 | 18.003   | -29.3858 | 1.114444 | -0.28088 |
| 贺娇娇 OS.jpg | -0.1788  | 0.0911   | -0.23188 | 0.275352 | 10.41058 | -6.45185 | 1.6287   | 0.111384 |
| 胡博震 OD.jpg | 0.181509 | 0.104734 | 1.174505 | 1.262496 | 44.15584 | 36.10104 | 0.863287 | -0.3701  |
| 胡博震 OS.jpg | 0.16028  | -0.05168 | 0.263834 | 0.358416 | 1.857154 | 4.433969 | 0.342812 | -0.2891  |
| 胡奇 OD.jpg  | 0.158053 | 0.190832 | 0.151675 | 0.438422 | 3.396537 | 4.925736 | 0.544129 | -0.18251 |
| 胡奇 OS.jpg  | -0.34837 | 0.041817 | -1.17059 | 0.343553 | 4.816167 | 10.31463 | 0.255027 | -0.23635 |
| 黄国成 OD.jpg | 0.673682 | 0.042183 | 1.806246 | -0.21813 | 25.20573 | -14.2846 | 0.183136 | -0.10531 |
| 黄国成 OS.jpg | 0.505445 | -0.07781 | 1.825542 | 0.839444 | -4.80312 | -0.46371 | -0.22528 | 0.152686 |
| 黄建花 OD.jpg | 0.482927 | -0.12939 | 0.827862 | -0.98892 | -5.0643  | -1.91068 | -0.11962 | 0.297223 |
| 黄建花 OS.jpg | -0.22103 | 0.048975 | -0.53227 | 0.28081  | -4.0382  | 0.846529 | -0.24153 | 0.390903 |
| 黄丽竹 OD.jpg | -0.1497  | 0.072223 | -0.22321 | -0.67959 | -6.25961 | -3.09474 | -0.12689 | -0.11649 |
| 黄丽竹 OS.jpg | -0.11956 | 0.195191 | -0.66926 | -0.09342 | 0.049894 | 4.829795 | 0.453687 | -0.4855  |
| 贾含 OD.jpg  | 0.121277 | 0.152225 | 0.3127   | -0.49188 | -2.93689 | 2.465577 | -0.02815 | 0.025456 |
| 贾含 OS.jpg  | -0.3286  | 0.041749 | -0.61406 | -0.3851  | -6.09442 | -1.08241 | -0.76685 | -0.11868 |
| 贾智岚 OD.jpg | -0.0777  | -0.06996 | -0.88167 | 0.01121  | -5.03101 | -1.37223 | -0.36526 | 0.283809 |
| 贾智岚 OS.jpg | -0.03403 | -0.11475 | -1.05581 | 0.243548 | -4.79536 | 0.659034 | -0.22822 | 0.474619 |
| 姜维 OD.jpg  | -0.40587 | 0.062383 | -0.81999 | 0.103241 | -1.99561 | 2.52869  | -0.51176 | -0.37    |
| 姜维 OS.jpg  | -0.23842 | -0.08326 | -1.10567 | 0.236538 | 3.404864 | 9.021008 | 0.377751 | -0.38579 |
| 蒋琴 OD.jpg  | 0.384719 | -0.0956  | 2.176208 | 1.490688 | -0.33006 | 3.112548 | -0.19752 | -0.69041 |

|            |           |          |          |          |          |          |          |          |
|------------|-----------|----------|----------|----------|----------|----------|----------|----------|
| 蒋琴 OS.jpg  | -0.07277  | -0.32923 | -0.32894 | -0.6973  | -0.42125 | 1.914391 | 1.944436 | 0.565763 |
| 蒋雯静 OD.jpg | 0.202372  | 0.028231 | 0.262934 | -0.3842  | 42.62159 | 6.77444  | 1.094287 | -0.31206 |
| 蒋雯静 OS.jpg | -6.19E-05 | 0.008129 | -0.22405 | -0.35412 | -3.93229 | -2.97506 | 0.426763 | -0.28073 |
| 蒋悠悠 OD.jpg | 0.083806  | 0.089674 | 1.036607 | 0.011869 | -4.50559 | 0.917818 | -0.34814 | 0.220516 |
| 蒋悠悠 OS.jpg | 0.061886  | -0.05677 | -0.4077  | -0.40322 | -5.90774 | -1.02553 | -0.06747 | 0.549869 |
| 焦迪 OD.jpg  | -0.19653  | 0.057767 | -0.34385 | 0.614083 | -4.21788 | -2.15322 | 0.054429 | -0.13207 |
| 焦迪 OS.jpg  | -0.22147  | -0.02621 | -0.93428 | 0.113756 | -4.97717 | -1.39827 | -0.47613 | -0.47171 |
| 靳景雯 OD.jpg | -0.14153  | -0.08039 | -0.36503 | -0.11749 | -6.16385 | -0.95467 | -0.15046 | 0.213224 |
| 靳景雯 OS.jpg | -0.11287  | -0.23173 | -0.45822 | -0.21837 | -6.98167 | -1.88989 | 0.005456 | 0.218652 |
| 李冰馨 OD.jpg | -0.24314  | -0.04978 | -1.03921 | 0.584084 | -5.13317 | -1.80664 | 0.353378 | -0.11936 |
| 李冰馨 OS.jpg | -0.21564  | -0.04276 | -0.70588 | -0.22261 | -3.70847 | -1.4151  | 0.020905 | -0.01973 |
| 李海怡 OD.jpg | 0.282549  | 0.254892 | 0.422567 | -0.95432 | -1.34436 | 1.040372 | 0.010792 | -0.67315 |
| 李海怡 OS.jpg | 0.755389  | -0.16868 | 1.344463 | -0.76434 | -4.97337 | -3.29006 | 0.239256 | 0.102965 |
| 李梅婷 OD.jpg | -0.34985  | 0.057294 | -0.87222 | 0.022828 | -3.84845 | -1.37491 | 0.674129 | -0.0741  |
| 李梅婷 OS.jpg | -0.39114  | 0.023521 | -1.1196  | 0.523532 | -3.00138 | -0.93512 | 0.190438 | -0.05526 |
| 李茜 OD.jpg  | -0.24351  | 0.111737 | -0.72425 | 0.163928 | -3.83202 | -1.56923 | -0.42512 | -0.29375 |
| 李茜 OS.jpg  | -0.11722  | -0.11741 | -0.68146 | -0.05581 | -5.57958 | -0.98831 | -0.56948 | -0.19543 |
| 李琴 OD.jpg  | 1.241777  | 0.151911 | 2.763178 | -0.06125 | -4.37597 | -0.09624 | -0.66462 | 0.108016 |
| 李琴 Os.jpg  | -0.31759  | 0.250348 | -0.30493 | -0.30074 | -5.11207 | -0.15633 | -0.26194 | 0.153248 |
| 李世豪 OD.jpg | 0.094184  | -0.16228 | 0.256733 | -0.61137 | 5.082444 | 12.47385 | 0.299405 | -0.53817 |
| 李世豪 OS.jpg | -0.02956  | -0.15237 | -0.33496 | -0.66998 | -5.30401 | -2.41217 | -0.43262 | 0.376292 |
| 李薇 OD.jpg  | -0.05727  | -0.13499 | -0.33451 | -0.51505 | -4.97947 | -2.17914 | -0.31569 | 0.21774  |
| 李薇 OS.jpg  | -0.27796  | -0.01047 | -0.772   | -0.16174 | -5.64721 | -0.53905 | -0.19422 | 0.088123 |
| 李鑫 OD.jpg  | -0.22304  | -0.03874 | -0.53023 | 0.167726 | 20.88053 | 18.5607  | 0.586564 | -0.42994 |

|            |          |          |          |          |          |          |          |          |
|------------|----------|----------|----------|----------|----------|----------|----------|----------|
| 李鑫 OS.jpg  | -0.02859 | -0.07965 | -0.71842 | 0.010179 | -5.95621 | -0.76152 | -0.35077 | 0.43365  |
| 李星玥 OD.jpg | -0.2054  | -0.12617 | -0.5987  | -0.00317 | -4.32555 | -1.84929 | 0.481092 | -0.34121 |
| 李星玥 OS.jpg | -0.18238 | -0.21266 | -0.56422 | -0.45039 | -7.0963  | -2.80177 | -0.48825 | 0.55631  |
| 李雪 OD.jpg  | -0.02727 | 0.082262 | 0.067195 | -0.40545 | -0.66859 | 0.707009 | 0.480206 | -0.21309 |
| 李雪 OS.jpg  | 0.118351 | 0.06219  | 0.378696 | -0.81242 | -2.80754 | -0.11819 | 1.606911 | 0.109126 |
| 李亚坤 OD.jpg | -0.35964 | 0.037058 | -0.89375 | 0.17651  | -5.39599 | -3.77212 | -0.10946 | 0.334634 |
| 李亚坤 OS.jpg | -0.33571 | 0.135597 | -0.60735 | -0.05293 | -5.87787 | -2.24457 | -0.35624 | 0.493448 |
| 李娅林 OD.jpg | 0.408903 | -0.25461 | 0.399817 | -1.17693 | -3.0248  | 1.218712 | 0.049902 | -0.12304 |
| 李娅林 OS.jpg | -0.13513 | -0.16037 | -1.05653 | 0.296788 | -5.17659 | -0.40106 | -0.1768  | 0.219904 |
| 李竹欣 OD.jpg | 0.885391 | -0.10822 | 1.33606  | -1.09864 | 5.4072   | -9.39304 | 0.348718 | -0.24991 |
| 李竹欣 OS.jpg | 0.247086 | 0.177419 | 1.221405 | 0.018104 | -3.63986 | -4.43975 | 0.595048 | -0.28753 |
| 廖琪琪 OD.jpg | 0.03274  | -0.14873 | 0.376445 | -0.52203 | -4.06005 | -2.0266  | 0.414195 | -0.2414  |
| 廖琪琪 OS.jpg | -0.14093 | -0.20166 | -0.79297 | -0.0769  | -1.28271 | 0.507327 | 0.06995  | -0.00446 |
| 廖先 OD.jpg  | 0.489454 | 0.090659 | 2.233915 | -0.18315 | -4.20483 | -1.76911 | -0.19033 | 0.133529 |
| 廖先 OS.jpg  | -0.22379 | -0.09536 | -0.44181 | -0.56127 | -5.20832 | -0.6822  | 0.24494  | -0.06264 |
| 刘超 OD.jpg  | 0.044989 | 0.096971 | 0.178431 | 0.424584 | -1.68846 | 3.895855 | -0.11131 | 0.071855 |
| 刘超 OS.jpg  | -0.20093 | -0.19863 | -0.53916 | -0.34091 | 11.93371 | 16.14111 | 0.164666 | -0.25534 |
| 刘纯灵 OD.jpg | 0.287549 | -0.08064 | 1.521711 | 0.502416 | 38.77387 | -21.8809 | 0.543987 | -0.45151 |
| 刘纯灵 OS.jpg | 0.045995 | 0.091041 | 0.276778 | -0.07682 | 4.798169 | 8.595261 | 0.843473 | -0.1256  |
| 刘丹 OD.jpg  | -0.24663 | 0.007004 | -0.55859 | -0.05388 | -4.88669 | 0.151516 | -0.18489 | 0.354033 |
| 刘丹 OS.jpg  | 0.162005 | 0.103692 | 0.540341 | -0.92717 | -1.64691 | 2.82327  | 0.098103 | 0.128327 |
| 刘冬梅 OD.jpg | -0.10716 | -0.26475 | -0.88408 | -0.05191 | -4.66239 | 0.02364  | -0.16123 | 0.240925 |
| 刘冬梅 OS.jpg | -0.33397 | -0.02437 | -0.72424 | -0.21054 | -4.48339 | -0.48617 | -0.03788 | -0.01059 |
| 刘佳秀 OD.jpg | -0.14691 | 0.035751 | -0.19486 | -0.08944 | -6.01684 | -2.30986 | -0.13105 | 0.280401 |
| 刘佳秀 OS.jpg | -0.04725 | 0.18403  | 0.704162 | 0.154288 | 5.483415 | -11.1344 | 0.033173 | -0.04526 |



|            |          |          |          |          |          |          |          |          |
|------------|----------|----------|----------|----------|----------|----------|----------|----------|
| 刘珈岑 OD.jpg | -0.19805 | -0.0154  | -0.33631 | -0.15768 | -3.85241 | -1.41888 | 0.559628 | -0.22684 |
| 刘珈岑 OS.jpg | -0.25747 | -0.07653 | -1.14292 | 0.545037 | -4.03699 | -0.63529 | 0.064232 | -0.03584 |
| 刘琪琪 OD.jpg | -0.00253 | 0.071608 | 0.374693 | -0.2489  | -4.38578 | -2.72041 | 0.008801 | 0.127988 |
| 刘琪琪 OS.jpg | -0.28821 | 0.093515 | -0.85369 | 0.492615 | -5.39467 | -1.51204 | -0.22731 | 0.30607  |
| 刘卿欣 OD.jpg | 0.098326 | 0.008242 | 0.738099 | -0.71816 | 6.152058 | 5.63789  | 0.170876 | -0.19909 |
| 刘卿欣 OS.jpg | -0.08486 | 0.116974 | -0.3304  | -0.62537 | 3.254714 | 1.910927 | 0.039603 | -0.03077 |
| 刘芮岐 OD.jpg | -0.05793 | -0.01216 | -0.30599 | -0.44546 | -0.84355 | 3.416617 | 0.340932 | -0.24018 |
| 刘芮岐 OS.jpg | 0.487573 | -0.13019 | 1.37141  | -0.06307 | -4.87836 | 0.697286 | -0.26061 | -0.12388 |
| 刘文力 OD.jpg | -0.27578 | -0.10829 | -1.01695 | 0.205596 | -4.93886 | 0.38336  | -0.40322 | 0.364713 |
| 刘文力 OS.jpg | -0.14607 | 0.07818  | -0.30224 | 0.246332 | -0.77659 | 4.37041  | -0.2078  | 0.108848 |
| 刘霞 OD.jpg  | 0.079327 | 0.031968 | 0.141998 | 0.035407 | 1.606948 | 4.948505 | 0.116699 | -0.08924 |
| 刘霞 OS.jpg  | -0.23942 | 0.063996 | -0.43256 | 0.921943 | 3.588103 | 10.27057 | 0.730513 | -0.35757 |
| 刘晓亚 OD.jpg | 1.011185 | -0.0562  | 1.638743 | -0.93098 | -5.45689 | -2.22143 | -0.29134 | 0.398566 |
| 刘晓亚 OS.jpg | -0.24133 | -0.12358 | -0.73195 | -0.20263 | -7.15023 | -2.59998 | -0.41928 | 0.601479 |
| 刘心语 OD.jpg | -0.3576  | 0.093138 | -1.03383 | 0.916114 | -5.40151 | -2.64856 | -0.07574 | 0.199735 |
| 刘心语 OS.jpg | -0.11244 | 0.086011 | -0.74197 | 0.261068 | -5.97708 | -1.51397 | -0.28803 | 0.534038 |
| 刘阳 OD.jpg  | -0.36043 | 0.092168 | -0.63549 | -0.28752 | -6.52376 | -2.26253 | -0.43316 | 0.458154 |
| 刘阳 OS.jpg  | -0.5215  | 0.155123 | -1.03347 | 0.149905 | -7.33569 | -0.65481 | -0.19524 | 0.797889 |
| 刘一乐 OD.jpg | -0.04236 | -0.05708 | 0.186576 | 1.067704 | 17.90976 | -29.7769 | 0.470278 | -0.22661 |
| 刘一乐 OS.jpg | 0.003261 | 0.252503 | 0.304536 | -0.61064 | 14.00518 | -14.3281 | 0.533925 | -0.27669 |
| 刘毅 OD.jpg  | -0.38165 | 0.04601  | -1.02028 | 0.30396  | 2.339054 | 4.385264 | -0.5998  | -0.51667 |
| 刘毅 OS.jpg  | -0.26041 | -0.04355 | -1.09997 | 0.4339   | -1.63704 | 1.631315 | -0.04067 | -0.00371 |
| 刘雨润 OD.jpg | 0.012355 | 0.046106 | -0.45247 | 0.339208 | -5.32878 | -0.22487 | -0.7284  | -0.20078 |
| 刘雨润 OS.jpg | -0.0739  | -0.07734 | -0.66504 | 0.49013  | -2.92537 | 1.111548 | 0.660502 | -0.28473 |
| 龙思琪 OD.jpg | -0.46632 | 0.225783 | -0.91579 | 1.629131 | 42.93818 | 37.77689 | 1.087553 | -0.3214  |

|                |          |          |          |          |          |          |          |          |
|----------------|----------|----------|----------|----------|----------|----------|----------|----------|
| 龙思琪 OS.jpg     | -0.18691 | 0.076067 | -0.26145 | 0.662432 | -0.25396 | 5.576841 | -0.28361 | -0.67367 |
| 陆新华 OD.jpg     | -0.28382 | 0.010406 | -0.59712 | 0.616375 | -3.05866 | 3.50873  | 0.066115 | -0.23277 |
| 陆新华 OS.jpg     | -0.18653 | 0.087213 | -0.62924 | -0.24645 | -4.55603 | 0.829918 | -0.20896 | -0.06144 |
| 罗骛 OD.jpg      | 0.321756 | 0.098038 | 0.560125 | 0.241057 | -4.99302 | 0.290446 | -0.21608 | 0.009146 |
| 罗骛 OS.jpg      | 0.084325 | 0.179887 | 0.326495 | -0.64923 | -4.49227 | 0.214397 | -0.69228 | -0.13316 |
| 罗芳 OD.jpg      | 2.109538 | 0.554196 | 2.684331 | -0.78398 | 30.01055 | 26.08976 | 0.824476 | -0.42865 |
| 罗芳 OS.jpg      | 0.036087 | 0.079024 | 0.31365  | 0.942679 | 11.79037 | 8.853561 | -0.18175 | -0.78074 |
| 罗苗 OD.jpg      | -0.30239 | 0.056085 | -0.6149  | -0.34341 | -1.96263 | 1.415766 | 0.261822 | -0.07657 |
| 罗苗 OS.jpg      | -0.19497 | 0.034522 | -0.54692 | -0.00881 | -4.35141 | -0.81985 | -0.20098 | 0.188525 |
| 罗婷 OD.jpg      | -0.29811 | 0.105771 | -0.73917 | -0.06364 | -5.25936 | -0.50087 | -0.18436 | 0.078981 |
| 罗婷 OS.jpg      | -0.26706 | 0.054122 | -0.94333 | 0.152763 | 0.621562 | 1.429624 | 0.162059 | -0.31655 |
| 吕楠君 OD.jpg     | 0.740857 | -0.10084 | 1.860475 | 0.304265 | -3.35772 | 0.925922 | 0.013092 | -0.03587 |
| 吕楠君 OS.jpg     | -0.24503 | 0.155643 | 0.465236 | 1.821    | -4.32904 | 1.263607 | -0.05121 | -0.10448 |
| 马嘉莉 OD.jpg     | -0.11071 | -0.03272 | -0.77905 | 0.090757 | -1.77518 | 2.299357 | -0.26295 | -0.71199 |
| 马嘉莉 OS.jpg     | -0.24899 | 0.229092 | -0.20466 | 0.643303 | -4.68474 | 0.270964 | 0.120613 | 0.08206  |
| 马嘉蔚 OD.jpg     | -0.12036 | -0.03725 | -0.46645 | -0.23889 | 35.99926 | 22.4341  | 0.247618 | -0.91338 |
| 马嘉蔚 OS.jpg     | -0.02293 | -0.1943  | -0.93742 | 0.07157  | 18.2896  | -3.5316  | 0.199328 | -0.03401 |
| 裴晨岑 OD.jpg     | 1.139628 | -0.05418 | 1.392498 | -1.22799 | -2.83021 | -0.50354 | 0.32886  | -0.14069 |
| 裴晨岑 OS.jpg     | -0.28869 | -0.0162  | -0.72255 | -0.05463 | -5.35547 | -1.12108 | -0.81291 | 0.178398 |
| 彭艳红 OD.jpg     | -0.29981 | -0.02461 | -0.71891 | -0.18856 | -6.44345 | -1.57842 | -0.58801 | 0.207359 |
| 彭艳红 OS.jpg     | -0.28748 | 0.065578 | 0.443238 | 0.715072 | -3.44658 | 1.114097 | -0.07551 | 0.308043 |
| 彭友慧 OD.jpg     | 0.137081 | 0.077629 | 0.300361 | -0.48103 | -6.31608 | -2.0951  | -0.77444 | 0.037488 |
| 彭友慧 OS.jpg     | -0.28385 | 0.091543 | -0.61044 | 0.443715 | -4.98495 | 0.592018 | -0.06135 | 0.512184 |
| 强巴卓玛<br>OD.jpg | -0.01518 | 0.064589 | 0.86334  | 0.126288 | -5.31949 | -1.4387  | 1.22154  | 0.263973 |

|                |          |          |          |          |          |          |          |          |
|----------------|----------|----------|----------|----------|----------|----------|----------|----------|
| 强巴卓玛<br>OS.jpg | 0.047336 | 0.077153 | 0.107685 | 0.549072 | -7.7381  | -2.89051 | -0.26404 | 0.483621 |
| 丘佳龙 OD.jpg     | -0.3224  | -0.05904 | -1.23934 | 0.476678 | -6.94859 | -2.46872 | -0.71179 | 0.022125 |
| 丘佳龙 OS.jpg     | -0.31575 | -0.04329 | -0.56842 | -0.24785 | -7.30684 | -2.771   | -0.41657 | 0.302101 |
| 邱超 OD.jpg      | 0.963958 | -0.22917 | 0.654155 | -1.29411 | -4.39929 | -0.14835 | -0.07613 | 0.197946 |
| 邱超 OS.jpg      | 0.968394 | -0.19035 | 4.808198 | 1.818117 | -6.095   | -4.22787 | 0.008688 | 0.330812 |
| 邵梦 OD.jpg      | -0.29155 | -0.11834 | -0.82798 | -0.17619 | 0.349189 | 4.917184 | 0.315494 | -0.18703 |
| 邵梦 OS.jpg      | -0.44752 | 0.067041 | -1.13314 | 0.372398 | -0.37314 | -2.0031  | 1.228585 | -0.06729 |
| 邵稀 OD.jpg      | 0.13631  | 0.076566 | 0.531775 | -0.3646  | 37.52703 | 32.54077 | 1.098633 | -0.22407 |
| 邵稀 OS.jpg      | -0.22521 | 0.017688 | -0.59739 | -0.3029  | -2.53462 | 4.287008 | -0.06349 | -0.11982 |
| 宋沛沅 OD.jpg     | -0.111   | 0.073532 | 0.18247  | 0.744742 | -0.86281 | -2.69522 | 1.794925 | 0.482848 |
| 宋沛沅 OS.jpg     | -0.13735 | -0.08691 | -0.82424 | 0.227202 | 1.440442 | 2.552789 | 0.556698 | -0.31009 |
| 孙慧 OD.jpg      | 0.472617 | -0.15596 | 1.327449 | -0.0654  | -4.53579 | -2.16889 | 0.091423 | 0.372905 |
| 孙慧 OS.jpg      | 0.085464 | -0.10559 | -0.09613 | 0.235845 | -6.63086 | -2.64692 | 0.033028 | 0.189054 |
| 孙婷 OD.jpg      | -0.30626 | 0.007453 | -0.7648  | -0.07652 | -4.24286 | -0.38967 | -0.37156 | 0.349483 |
| 孙婷 OS.jpg      | -0.22496 | -0.00596 | -0.35456 | -0.05861 | -5.33695 | -0.13573 | -0.17908 | 0.194635 |
| 孙艳 OD.jpg      | 0.164612 | -0.10554 | -0.03882 | -0.68752 | -3.91065 | -0.0728  | -0.06597 | 0.28822  |
| 孙艳 OS.jpg      | -0.01369 | 0.08378  | -0.05252 | 0.349168 | -5.0808  | -1.90141 | -0.1684  | 0.225175 |
| 唐良君 OD.jpg     | 0.789793 | 0.011736 | 2.31915  | 0.183178 | -1.12117 | 5.007647 | -0.05199 | -0.19805 |
| 唐良君 OS.jpg     | 0.116856 | -0.12989 | 0.162861 | 0.029903 | -0.18894 | 6.148671 | -0.30004 | -0.56495 |
| 唐蓉 OD.jpg      | -0.2756  | -0.02226 | -0.78564 | -0.05847 | -5.76368 | -2.4272  | -0.16299 | 0.166474 |
| 唐蓉 OS.jpg      | -0.29457 | -0.07798 | -1.08808 | 0.277677 | -5.42307 | -1.50213 | -0.72879 | 0.27154  |
| 唐婉康 OD.jpg     | -0.23119 | -0.05338 | -0.52556 | 0.577998 | 3.57585  | 4.724624 | -0.0287  | -0.11036 |
| 唐婉康 OS.jpg     | 0.71598  | -0.01227 | 0.687085 | -1.33458 | 9.855174 | 7.169718 | -0.404   | -0.55714 |
| 唐雪潇 OD.jpg     | -0.20491 | 0.080228 | -0.63522 | 0.282312 | -1.03785 | 5.550747 | -0.45258 | -0.55827 |

|            |          |          |          |          |          |          |          |          |
|------------|----------|----------|----------|----------|----------|----------|----------|----------|
| 唐雪潇 OS.jpg | -0.27526 | 0.10175  | -1.00472 | 0.412836 | -2.0341  | 2.67309  | -0.4138  | -0.40099 |
| 唐瑶 OD.jpg  | -0.13392 | 0.132688 | 0.432784 | 0.201558 | -4.44279 | -1.62756 | 1.26781  | 0.147402 |
| 唐瑶 OS.jpg  | 0.258391 | 0.242744 | 1.061045 | -0.52671 | -0.46268 | 2.480738 | -0.42954 | -0.43668 |
| 唐羽婷 OD.jpg | 0.083034 | 0.13719  | 0.477713 | 0.069014 | -5.18692 | -1.57559 | -0.60767 | -0.18921 |
| 唐羽婷 OS.jpg | 1.222756 | -0.03628 | 1.12424  | -1.4252  | -3.02037 | 1.038539 | 0.134508 | 0.144361 |
| 唐月 OD.jpg  | -0.32301 | 0.050585 | -0.73057 | 0.596166 | -3.48793 | 1.148298 | -0.46696 | -0.40037 |
| 唐月 OS.jpg  | -0.21654 | -0.04591 | -1.06244 | 0.273729 | -4.10684 | -1.2568  | 0.250768 | -0.38667 |
| 唐子涵 OD.jpg | -0.04637 | 0.022528 | -0.29901 | -0.39102 | 5.655409 | -9.01149 | -0.04743 | -0.03467 |
| 唐子涵 OS.jpg | -0.3304  | 0.017323 | -0.80538 | -0.08453 | -2.9397  | 3.526802 | 0.172008 | -0.114   |
| 王春梅 OD.jpg | -0.09914 | -0.11308 | -0.61357 | 0.303708 | -3.93401 | -2.10489 | -0.7281  | -0.04961 |
| 王春梅 OS.jpg | -0.23285 | -0.15923 | -0.63368 | -0.33358 | -6.1811  | -2.79099 | -0.40129 | 0.391149 |
| 王菲 OD.jpg  | 0.394752 | 0.181771 | 1.050549 | -0.47262 | 5.873761 | 10.8021  | 0.150834 | -0.30334 |
| 王菲 OS.jpg  | 0.531347 | -0.10996 | 0.450726 | -0.84469 | -5.93391 | 0.160344 | -0.11593 | 0.372861 |
| 王虹燕 OD.jpg | -0.24448 | 0.002816 | -0.94493 | 0.172704 | -6.2413  | -1.32093 | -0.92651 | -0.02796 |
| 王虹燕 OS.jpg | -0.25177 | 0.040856 | -0.57831 | -0.36863 | -6.82528 | -1.19491 | -0.20195 | 0.325599 |
| 王晶 OD.jpg  | -0.1067  | 0.025109 | 0.097401 | 0.278603 | 17.44133 | -6.17292 | 0.20856  | -0.24472 |
| 王晶 OS.jpg  | -0.27378 | -0.02977 | -1.00766 | 0.131145 | -4.11148 | -0.15976 | -0.04176 | 0.253343 |
| 王婧璐 OD.jpg | 0.312431 | 0.089614 | 1.171989 | 0.267857 | 25.87084 | 8.313358 | 0.28486  | -0.47136 |
| 王婧璐 OS.jpg | -0.03505 | -0.09036 | -0.16456 | -0.73169 | -4.30597 | -0.31188 | 0.35489  | -0.30542 |
| 王蕾 OD.jpg  | -0.2435  | 0.01316  | -0.27196 | -0.51605 | -5.81328 | -3.52726 | -0.1905  | 0.442129 |
| 王蕾 OS.jpg  | -0.18687 | 0.095558 | -0.54144 | -0.13369 | -6.83873 | -1.66208 | -0.33009 | 0.684674 |
| 王莉莉 OD.jpg | -0.16807 | -0.01907 | -0.18255 | 0.197013 | -1.80981 | 1.480948 | 0.212888 | -0.16549 |
| 王莉莉 OS.jpg | -0.20151 | 0.092052 | -0.60529 | -0.23943 | -6.68625 | -2.87744 | 0.012491 | 0.621737 |
| 王璐 OD.jpg  | 0.539355 | 0.141716 | 1.49861  | 0.777716 | -5.78849 | -1.47017 | -0.69651 | -0.27138 |
| 王璐 OS.jpg  | -0.379   | 0.072934 | -1.16739 | 0.340325 | -7.41603 | -2.56426 | -0.75722 | 0.031462 |

|                |          |          |          |          |          |          |          |          |
|----------------|----------|----------|----------|----------|----------|----------|----------|----------|
| 王琪 OD.jpg      | 0.24427  | -0.12451 | 0.193766 | 0.662826 | -3.18689 | -6.55223 | 0.060392 | 0.233062 |
| 王琪 OS.jpg      | -0.31195 | 0.217367 | -0.29977 | 0.475206 | -2.06849 | 1.218889 | -0.27952 | 0.024096 |
| 王倩 OD.jpg      | 0.193061 | 0.058467 | 1.220963 | 1.541485 | 21.03412 | 23.56225 | 0.05154  | -0.89715 |
| 王倩 OS.jpg      | -0.20126 | -0.00407 | -0.57539 | -0.25385 | -5.8758  | 0.335433 | -0.1678  | 0.484035 |
| 王清玻 OD.jpg     | -0.37031 | 0.115178 | -0.67771 | 0.46554  | -4.02406 | 0.469962 | -0.69646 | -0.27401 |
| 王清玻 OS.jpg     | -0.27509 | -0.11438 | -0.96963 | 0.058658 | -2.87329 | 3.278295 | -0.19106 | 0.130916 |
| 王亚方 OD.jpg     | -0.21173 | -0.1425  | -0.87509 | 0.061627 | 1.731557 | 5.24749  | 0.234012 | -0.32541 |
| 王亚方 OS.jpg     | -0.44006 | 0.057465 | -0.83709 | -0.07731 | -2.31257 | -0.66869 | 0.642888 | -0.28087 |
| 巫应航畅<br>OD.jpg | -0.11569 | -0.05478 | -0.50522 | 0.003863 | -4.46053 | 0.773567 | -0.0565  | -0.1559  |
| 巫应航畅<br>OS.jpg | -0.31742 | 0.087901 | -0.87165 | 0.319495 | -3.21414 | 1.573792 | -0.05341 | -0.02211 |
| 吴丹 OD.jpg      | 0.075266 | -0.12752 | -0.24036 | 0.794233 | -5.97198 | -2.56854 | -0.08661 | 0.522014 |
| 吴丹 OS.jpg      | -0.1593  | -0.06891 | -0.76536 | 0.350754 | -4.35343 | 1.602684 | -0.07396 | 0.153933 |
| 吴广 OD.jpg      | 0.299938 | 0.154026 | 1.068636 | -0.453   | -2.28128 | 1.988823 | -0.08039 | -0.22408 |
| 吴广 OS.jpg      | -0.33403 | 0.022607 | -0.74844 | 0.547342 | 4.372981 | 5.217293 | -0.01363 | -0.1437  |
| 吴洪霞 OD.jpg     | -0.19384 | 0.084735 | -0.20988 | -0.4262  | -3.51599 | 0.091555 | -0.694   | -0.11462 |
| 吴洪霞 OS.jpg     | 0.134887 | -0.02424 | -0.10671 | -0.92848 | -4.54183 | -2.39461 | -0.31018 | 0.199982 |
| 吴慧 OD.jpg      | 0.092665 | -0.02097 | -0.07744 | -0.80678 | -3.25616 | 2.551754 | -0.07034 | 0.246425 |
| 吴慧 OS.jpg      | -0.31681 | 0.007776 | -0.58474 | -0.37515 | -5.68262 | -0.78999 | -0.18787 | 0.222393 |
| 吴明珠 OD.jpg     | -0.0827  | -0.0516  | 0.128628 | 0.441473 | 17.37055 | 13.17214 | 2.101095 | 0.798449 |
| 吴明珠 OS.jpg     | -0.19761 | -0.0536  | -0.48334 | -0.21875 | 13.81516 | -0.71398 | 0.151452 | -0.0581  |
| 吴秋云 OD.jpg     | -0.32187 | -0.00551 | -1.04525 | 0.169696 | -4.5983  | -0.66481 | -0.07835 | 0.193895 |
| 吴秋云 OS.jpg     | -0.18725 | -0.12202 | -0.94566 | 0.363873 | -5.08658 | -1.69922 | -0.33589 | 0.195734 |
| 吴晓彤 OD.jpg     | 0.474122 | 0.266857 | 1.436532 | -0.3561  | 1.369254 | 0.371354 | -0.18123 | -0.66672 |

|            |          |          |          |          |          |          |          |          |
|------------|----------|----------|----------|----------|----------|----------|----------|----------|
| 吴晓彤 OS.jpg | -0.0898  | -0.11263 | -0.60396 | 0.193908 | -0.84074 | 5.465533 | 0.197883 | -0.36616 |
| 吴雪 OD.jpg  | 0.731244 | -0.1114  | 1.771821 | 0.091891 | -6.03421 | 1.324332 | 0.236073 | 0.04863  |
| 吴雪 OS.jpg  | 0.746583 | -0.11753 | 1.911507 | -0.20687 | 1.851647 | 10.08006 | 0.51675  | -0.48644 |
| 武艳云 OD.jpg | 0.12339  | -0.09363 | 0.540881 | 1.064738 | 47.80177 | -7.99251 | 0.126135 | -0.04461 |
| 武艳云 OS.jpg | -0.2143  | 0.149526 | -0.27482 | -0.0416  | -0.37192 | -2.13451 | 0.119765 | -0.1872  |
| 肖文倩 OD.jpg | -0.28084 | 0.10703  | -0.70816 | 0.086563 | 11.13946 | 5.330827 | 0.319325 | -0.08509 |
| 肖文倩 OS.jpg | 0.681366 | 0.277362 | 1.263473 | -0.71107 | -6.01734 | -0.29663 | 0.061034 | 0.300777 |
| 谢刚 OD.jpg  | -0.35353 | -0.02614 | -0.85923 | 0.045669 | -1.10359 | 1.486285 | -0.13707 | -0.69797 |
| 谢刚 OS.jpg  | 0.221034 | -0.15358 | 0.166131 | -0.08139 | -5.69637 | -2.35553 | -0.77659 | -0.10204 |
| 谢颖 OD.jpg  | -0.29406 | -0.02183 | -0.56927 | 0.532856 | -4.73905 | 0.419902 | -0.69813 | -0.08693 |
| 谢颖 OS.jpg  | -0.46386 | 0.078595 | -0.9952  | 0.058007 | -2.40896 | -7.59982 | 0.13687  | -0.01042 |
| 谢雨非 OD.jpg | 0.653236 | -0.22516 | 1.395682 | 0.137482 | 7.325558 | 7.76099  | 0.375454 | -0.31054 |
| 谢雨非 OS.jpg | 0.174215 | -0.37403 | -0.10838 | -0.8058  | -3.30822 | 0.558254 | 0.064187 | -0.10853 |
| 熊敏 OD.jpg  | 0.118414 | 0.171885 | 0.437186 | 0.262664 | 33.15751 | -17.5298 | 0.346677 | -0.4052  |
| 熊敏 OS.jpg  | -0.41329 | 0.033084 | -0.99529 | 0.064166 | -6.84728 | -1.92341 | -0.36293 | 0.61396  |
| 徐鑫艺 OD.jpg | -0.15215 | -0.11452 | -0.85652 | 0.229197 | -0.19004 | 5.873005 | -0.09078 | -0.08555 |
| 徐鑫艺 OS.jpg | -0.25511 | -0.07366 | -0.63186 | -0.37174 | -1.91954 | 2.906639 | -0.18755 | 0.10534  |
| 徐友琴 OD.jpg | -0.10183 | 0.204514 | 0.505668 | 0.072193 | -3.78706 | 0.824249 | -0.35682 | 0.441327 |
| 徐友琴 OS.jpg | 0.493203 | 0.178261 | 1.276653 | -0.49457 | -6.39926 | -2.36558 | -1.01451 | 0.1227   |
| 徐珍 OD.jpg  | -0.17565 | -0.04304 | -0.61505 | -0.06833 | -0.81969 | 0.865432 | 2.207854 | 0.929434 |
| 徐珍 OS.jpg  | -0.20666 | -0.10187 | -0.87656 | -0.01269 | -6.04752 | -1.63958 | -0.26867 | 0.369589 |
| 许亚琼 OD.jpg | 1.385062 | 0.015393 | 1.678789 | -1.14855 | -2.27033 | -0.34714 | 2.154095 | 1.038453 |
| 许亚琼 OS.jpg | -0.26294 | -0.03924 | -0.32351 | -0.6709  | -4.52826 | 0.641179 | -0.16542 | 0.023958 |
| 严仙 OD.jpg  | -0.36886 | -0.02831 | -0.59651 | -0.41726 | -7.69623 | -2.32539 | -0.36852 | 0.410244 |
| 严仙 OS.jpg  | -0.30008 | 0.053567 | -0.82671 | -0.01675 | -2.70613 | -1.72639 | 0.13869  | -0.05358 |

|            |          |          |          |          |          |          |          |          |
|------------|----------|----------|----------|----------|----------|----------|----------|----------|
| 晏丽雪 OD.jpg | -0.16696 | 0.156373 | 0.479229 | 0.278814 | 2.225591 | -13.862  | 0.29869  | 0.259127 |
| 晏丽雪 OS.jpg | -0.10608 | 0.0133   | 0.041704 | -0.41153 | -6.07429 | -1.90432 | 0.029098 | 0.131645 |
| 杨菲菲 OD.jpg | -0.12602 | 0.313267 | -0.20871 | 0.25498  | -6.91987 | -3.80607 | -0.16762 | 0.364318 |
| 杨菲菲 OS.jpg | 0.046452 | 0.111234 | -0.35865 | -0.07762 | -7.95131 | -0.8896  | -0.47789 | 0.389763 |
| 杨荟洁 OD.jpg | 0.059629 | 0.128164 | -0.17792 | 0.343097 | 12.12667 | 10.06026 | 0.520316 | -0.37894 |
| 杨荟洁 OS.jpg | 0.242589 | 0.116765 | 0.861387 | 0.514004 | -1.42471 | 0.842406 | -0.05653 | -0.2377  |
| 杨竞意 OD.jpg | -0.09204 | -0.09729 | -0.43524 | -0.45675 | -0.39085 | 5.418809 | -0.0155  | -0.20712 |
| 杨竞意 OS.jpg | -0.03428 | -0.21294 | -0.4941  | -0.30885 | -4.07563 | 1.209232 | -0.22725 | 0.225839 |
| 杨馨颖 OD.jpg | -0.09154 | -0.05246 | -0.26215 | 0.06545  | -5.80663 | -1.85104 | -0.18661 | 0.235628 |
| 杨馨颖 OS.jpg | -0.14046 | 0.029683 | -0.37755 | -0.39777 | -6.4527  | -2.24001 | 0.235477 | 0.367595 |
| 杨逸芸 OD.jpg | 0.716017 | -0.34794 | 0.84103  | -1.40185 | -6.43859 | -2.96609 | -0.30683 | 0.357694 |
| 杨逸芸 OS.jpg | -0.16661 | 0.069478 | 0.445154 | 0.329095 | -5.83863 | -0.86073 | -0.17257 | 0.118569 |
| 易雪 OD.jpg  | 0.542646 | -0.04677 | 1.802525 | 0.926592 | 1.463509 | 6.869254 | 0.139149 | -0.50349 |
| 易雪 OS.jpg  | 0.705312 | -0.04389 | 1.929382 | 0.155537 | -4.37726 | 1.741719 | -0.37397 | 0.049143 |
| 尹雪丹 OD.jpg | -0.15973 | -0.08196 | -0.49441 | -0.41457 | 31.73763 | -26.7345 | 1.424251 | -0.11583 |
| 尹雪丹 OS.jpg | -0.04012 | -0.19322 | -0.40147 | -0.24103 | -2.49019 | -2.27482 | 1.250047 | -0.00998 |
| 余霞 OD.jpg  | -0.1076  | -0.2615  | -0.95795 | 0.079038 | -3.73223 | -0.39848 | -0.38499 | -0.43858 |
| 余霞 OS.jpg  | -0.28563 | 0.076575 | -0.39087 | -0.05214 | -5.39809 | -0.57331 | -0.97304 | -0.11458 |
| 袁利发 OD.jpg | -0.14045 | -0.13835 | -0.44675 | -0.60316 | -1.61    | 1.485224 | 1.599448 | 0.3215   |
| 袁利发 OS.jpg | -0.11403 | -0.24169 | -0.23261 | -0.84573 | 82.30772 | -28.8039 | 1.597088 | 0.631944 |
| 岳港 OD.jpg  | 0.993493 | 0.176498 | 1.69046  | -1.20196 | -7.27003 | -2.64235 | -0.45522 | 0.515906 |
| 岳港 OS.jpg  | -0.13357 | -0.1128  | -0.55532 | -0.11142 | -6.31557 | -0.32119 | -0.24761 | 0.247944 |
| 张聪 OD.jpg  | 0.820605 | -0.04154 | 2.427571 | 0.700886 | -2.10831 | 5.293803 | 0.076749 | -0.21728 |
| 张聪 OS.jpg  | 0.764093 | 0.107305 | 1.620311 | -0.93655 | -4.60303 | -0.12102 | -0.40296 | 0.295882 |
| 张晖榕 OD.jpg | -0.15742 | 0.003386 | -0.4917  | 0.122297 | 17.48538 | 13.61351 | 0.439008 | -0.48599 |

|            |          |          |          |          |          |          |          |          |
|------------|----------|----------|----------|----------|----------|----------|----------|----------|
| 张晖榕 OS.jpg | -0.22683 | 0.133556 | 0.076928 | 0.294906 | 48.73261 | -19.3935 | 0.549901 | 0.108779 |
| 张捷 OD.jpg  | -0.02714 | 0.090424 | -0.11225 | -0.04238 | -4.42316 | -0.02264 | -0.39268 | 0.367332 |
| 张捷 OS.jpg  | -0.28807 | -0.05955 | -0.4805  | -0.49278 | -4.63971 | -5.24165 | 0.31267  | 0.053356 |
| 张晶 OD.jpg  | -0.32493 | 0.065212 | -0.70313 | 0.743648 | -4.93979 | -1.35539 | -0.12729 | 0.325683 |
| 张晶 OS.jpg  | -0.2437  | -0.01606 | -0.12865 | -0.85992 | -5.8177  | -0.15756 | -0.33014 | 0.407004 |
| 张丽萍 OD.jpg | 0.067238 | -0.07037 | -0.09998 | 0.245366 | 0.429205 | -2.75287 | -0.14094 | 0.306684 |
| 张丽萍 OS.jpg | -0.18357 | -0.08461 | -0.75043 | -0.19884 | -3.77825 | 1.41729  | -0.30798 | 0.07778  |
| 张萍 OD.jpg  | -0.34857 | -0.00908 | -0.82011 | -0.10018 | -5.90201 | -2.50152 | -0.3556  | 0.378629 |
| 张萍 OS.jpg  | 0.118894 | -0.03203 | -0.49347 | 0.150377 | -5.50204 | -2.35762 | -0.18393 | -0.36035 |
| 张萧文 OD.jpg | -0.22049 | 0.031406 | -0.72495 | -0.0468  | -3.96091 | 0.326365 | -0.60072 | -0.34133 |
| 张萧文 OS.jpg | -0.27641 | 0.110295 | -0.43721 | 0.004132 | -5.26901 | -2.95918 | -0.20557 | 0.453952 |
| 张潇月 OD.jpg | 0.241739 | 0.006444 | 0.214201 | -0.30387 | -4.94839 | -1.51292 | -0.6374  | -0.1362  |
| 张潇月 OS.jpg | 0.482503 | 0.058569 | 1.556268 | -0.25549 | 0.17939  | 5.452974 | -0.21672 | 0.035397 |
| 张晓清 OD.jpg | -0.18128 | 0.105033 | -0.2876  | 0.829399 | -0.96928 | -5.34697 | 0.022306 | -0.25222 |
| 张晓清 OS.jpg | 0.206282 | -0.03778 | 0.173109 | 0.475486 | -6.6609  | -2.99373 | 0.016329 | 0.31475  |
| 张馨月 OD.jpg | 0.110717 | -0.19162 | -0.55255 | 0.145742 | -5.66391 | -1.41435 | 0.371784 | 0.198614 |
| 张馨月 OS.jpg | -0.16402 | -0.03099 | -1.01033 | 0.246824 | 0.92758  | 6.12358  | 0.190934 | -0.33328 |
| 张雪梅 OD.jpg | -0.09162 | -0.00727 | -0.25697 | -0.104   | -3.03834 | 2.783912 | -0.57894 | -0.46567 |
| 张雪梅 OS.jpg | -0.27594 | 0.049148 | -0.85728 | 0.459043 | -0.67586 | 1.721109 | -0.05969 | -0.04311 |
| 张一心 OD.jpg | 0.147861 | -0.09019 | 0.503842 | -0.10604 | -3.36266 | 1.255658 | -0.17101 | 0.096182 |
| 张一心 OS.jpg | 0.523528 | -0.25059 | 0.696445 | -1.31657 | -4.25849 | 2.013998 | -0.90584 | -0.22857 |
| 张跃兰 OD.jpg | -0.31795 | 0.016982 | -1.09886 | 0.888758 | -5.32576 | -1.52931 | -0.63293 | -0.07052 |
| 张跃兰 OS.jpg | 0.097513 | -0.0581  | 0.532268 | 1.224429 | -3.32166 | -1.60117 | 1.569565 | 0.379933 |
| 赵元琪 OD.jpg | -0.22721 | -0.0592  | -0.77657 | 0.162934 | -2.21143 | 0.194358 | -0.19282 | -0.65381 |
| 赵元琪 OS.jpg | -0.35867 | 0.009577 | -0.84206 | -0.09293 | -6.28674 | -2.08595 | -0.74633 | 0.059585 |



|            |          |          |          |          |          |          |          |          |
|------------|----------|----------|----------|----------|----------|----------|----------|----------|
| 折欣雨 OD.jpg | 0.021766 | -0.30313 | -0.66689 | -0.3124  | -4.62422 | -0.16984 | -0.06607 | 0.269089 |
| 折欣雨 OS.jpg | 0.114736 | -0.31011 | -0.21069 | -0.89017 | -5.95789 | -0.46357 | -0.81022 | 0.17113  |
| 郑春梅 OD.jpg | -0.2619  | 0.018038 | -0.65227 | -0.22143 | -3.5781  | 1.016081 | -0.16281 | -0.11826 |
| 郑春梅 OS.jpg | -0.33852 | -0.00056 | -1.14681 | 0.294239 | -4.69863 | -1.04865 | 0.21719  | 0.234281 |
| 郑忆玲 OD.jpg | -0.19763 | -0.12217 | -0.44981 | -0.49132 | -6.26998 | -2.4747  | -0.21086 | 0.191518 |
| 郑忆玲 OS.jpg | 0.222219 | -0.16568 | 0.452384 | 0.333898 | -2.22036 | 0.709033 | 0.124325 | -0.11216 |
| 周成阳 OD.jpg | 0.341954 | 0.025049 | 0.717173 | -0.42925 | -4.36935 | -0.96188 | -0.83995 | 0.12117  |
| 周成阳 OS.jpg | 0.346657 | 0.146054 | 1.497609 | -0.36201 | -7.52606 | -3.17203 | -0.19373 | 0.532781 |
| 周露 OD.jpg  | -0.07408 | -0.07779 | -0.72348 | 0.036098 | -6.78373 | -2.84467 | -0.58245 | -0.14658 |
| 周露 OS.jpg  | -0.15387 | -0.02471 | -0.70829 | -0.06702 | -4.51137 | 0.989299 | -0.31305 | 0.010841 |
| 周雪梅 OD.jpg | 0.244208 | 0.030852 | 0.914051 | 0.518645 | 21.64625 | -25.3737 | 0.114141 | 0.030616 |
| 周雪梅 OS.jpg | -0.15018 | -0.1183  | -0.26656 | -0.64654 | 28.8236  | 22.53306 | -0.13264 | 0.032055 |
| 周圆城 OD.jpg | 0.793903 | 0.048198 | 2.030355 | -0.15741 | -3.41218 | 2.049909 | -0.27345 | -0.02738 |
| 周圆城 OS.jpg | 0.058598 | 0.187951 | 0.625576 | -0.04619 | 12.45579 | -22.0294 | 0.36027  | -0.32348 |
| 朱红 OD.jpg  | 0.123014 | -0.00564 | 0.423913 | -0.56993 | -3.07598 | 1.041435 | 0.127475 | -0.26982 |
| 朱红 OS.jpg  | -0.15007 | -0.18742 | 0.064478 | -0.99802 | -3.02916 | 2.030788 | -0.11196 | -0.21566 |
| 朱静 OD.jpg  | 0.727995 | -0.00197 | 2.653374 | 0.075064 | 19.26772 | 9.008215 | 0.694582 | -0.29293 |
| 朱静 OS.jpg  | 0.122707 | 0.034633 | 0.634906 | 0.536094 | 33.60364 | -25.1264 | 0.260032 | -0.0734  |
| 朱珏瑾 OD.jpg | -0.18324 | -0.11912 | -1.04062 | 0.219061 | -2.96674 | -1.10949 | 1.065503 | -0.06816 |
| 朱珏瑾 OS.jpg | 0.004065 | 0.028095 | 1.019692 | -0.17541 | -4.90708 | -1.17562 | -0.48569 | -0.14262 |
| 朱睿 OD.jpg  | -0.2473  | 0.152896 | -0.9038  | 0.168524 | -4.36219 | -1.20467 | -0.33859 | 0.183509 |
| 朱睿 OS.jpg  | -0.25832 | 0.027941 | -0.56511 | -0.41157 | -1.90419 | 0.475164 | -0.00994 | -0.03656 |
| 邹汝玺 OD.jpg | 0.202236 | 0.140281 | 1.483489 | 0.265097 | -6.49716 | -0.51077 | -0.16198 | 0.456568 |
| 邹汝玺 OS.jpg | 0.316552 | 0.064394 | 2.3389   | 1.659753 | 6.851803 | 11.77674 | 0.45257  | -0.23066 |

Table S2: The detail metrics for assessment of six machine learning models

| model_name   | Accuracy | AUC      | 95% CI             | Sensitivity | Specificity | PPV      | NPV      | Precision | Recall   | F1       | Threshold | Task            |
|--------------|----------|----------|--------------------|-------------|-------------|----------|----------|-----------|----------|----------|-----------|-----------------|
| SVM          | 0.9791   | 0.991461 | 0.9835 -<br>0.9995 | 0.981481    | 0.97651     | 0.978462 | 0.979798 | 0.978462  | 0.981481 | 0.979969 | 0.531888  | label-<br>train |
| SVM          | 0.965812 | 0.995601 | 0.9897 -<br>1.0000 | 0.935484    | 1           | 1        | 0.932203 | 1         | 0.935484 | 0.966667 | 0.64749   | label-val       |
| SVM          | 0.974194 | 0.993493 | 0.9859 -<br>1.0000 | 0.962963    | 0.986486    | 0.987342 | 0.960526 | 0.987342  | 0.962963 | 0.975    | 0.691771  | label-<br>test  |
| KNN          | 0.972669 | 0.996235 | 0.9938 -<br>0.9987 | 0.975309    | 0.969799    | 0.972308 | 0.973064 | 0.972308  | 0.975309 | 0.973806 | 0.6       | label-<br>train |
| KNN          | 0.948718 | 0.994135 | 0.9872 -<br>1.0000 | 0.919355    | 0.981818    | 0.982759 | 0.915254 | 0.982759  | 0.919355 | 0.95     | 0.6       | label-val       |
| KNN          | 0.967742 | 0.996914 | 0.9928 -<br>1.0000 | 0.962963    | 0.972973    | 0.975    | 0.96     | 0.975     | 0.962963 | 0.968944 | 0.6       | label-<br>test  |
| RandomForest | 0.993569 | 0.999876 | 0.9997 -<br>1.0000 | 0.990741    | 0.996644    | 0.996894 | 0.99     | 0.996894  | 0.990741 | 0.993808 | 0.6       | label-<br>train |
| RandomForest | 0.991453 | 0.995308 | 0.9860 -<br>1.0000 | 0.983871    | 1           | 1        | 0.982143 | 1         | 0.983871 | 0.99187  | 0.5       | label-val       |
| RandomForest | 0.967742 | 0.987487 | 0.9734 -<br>1.0000 | 0.962963    | 0.972973    | 0.975    | 0.96     | 0.975     | 0.962963 | 0.968944 | 0.6       | label-<br>test  |
| ExtraTrees   | 0.995177 | 0.999953 | 0.9999 -<br>1.0000 | 0.990741    | 1           | 1        | 0.990033 | 1         | 0.990741 | 0.995349 | 1         | label-<br>train |
| ExtraTrees   | 0.991453 | 0.999267 | 0.9976 -<br>1.0000 | 1           | 0.981818    | 0.984127 | 1        | 0.984127  | 1        | 0.992    | 0.5       | label-val       |

|            |          |          |                    |          |          |          |          |          |          |          |          |                 |
|------------|----------|----------|--------------------|----------|----------|----------|----------|----------|----------|----------|----------|-----------------|
| ExtraTrees | 0.96129  | 0.986236 | 0.9656 -<br>1.0000 | 0.975309 | 0.958904 | 0.951807 | 0.972222 | 0.951807 | 0.975309 | 0.963415 | 0.6      | label-<br>test  |
| XGBoost    | 0.990354 | 0.998799 | 0.9972 -<br>1.0000 | 0.984568 | 0.996644 | 0.996875 | 0.983444 | 0.996875 | 0.984568 | 0.990683 | 0.67008  | label-<br>train |
| XGBoost    | 0.982906 | 0.996041 | 0.9886 -<br>1.0000 | 0.967742 | 1        | 1        | 0.964912 | 1        | 0.967742 | 0.983607 | 0.686147 | label-val       |
| XGBoost    | 0.974194 | 0.99316  | 0.9853 -<br>1.0000 | 0.962963 | 0.986486 | 0.987342 | 0.960526 | 0.987342 | 0.962963 | 0.975    | 0.673383 | label-<br>test  |
| LightGBM   | 0.946945 | 0.989995 | 0.9853 -<br>0.9947 | 0.966049 | 0.926174 | 0.934328 | 0.961672 | 0.934328 | 0.966049 | 0.949924 | 0.517858 | label-<br>train |
| LightGBM   | 0.923077 | 0.980792 | 0.9632 -<br>0.9984 | 0.854839 | 1        | 1        | 0.859375 | 1        | 0.854839 | 0.921739 | 0.617184 | label-val       |
| LightGBM   | 0.935484 | 0.988572 | 0.9784 -<br>0.9987 | 0.901235 | 0.972973 | 0.973333 | 0.9      | 0.973333 | 0.901235 | 0.935897 | 0.602235 | label-<br>test  |
